# Supplementary material for: Optimized single-nucleus transcriptional profiling by combinatorial indexing
Source: Springer Nature journal article supplement (doi:10.1038/s41596-022-00752-0), 2022-10-19
Supplement: MOESM2 [file 41596_2022_752_MOESM2_ESM21.xlsx]

## Sheet: 3lvl_mRNA_RT_plate_1
Well Position	Name	Sequence
A1	sc_ligation_RT_1	/5Phos/CAGAGCNNNNNNNNTCCTACCAGTTTTTTTTTTTTTTTTTTTTTTTTTTTTTTT
B1	sc_ligation_RT_13	/5Phos/CAGAGCNNNNNNNNTTGACTTCAGTTTTTTTTTTTTTTTTTTTTTTTTTTTTTT
C1	sc_ligation_RT_25	/5Phos/CAGAGCNNNNNNNNACTATGCAATTTTTTTTTTTTTTTTTTTTTTTTTTTTTTT
D1	sc_ligation_RT_37	/5Phos/CAGAGCNNNNNNNNTCTGATACCATTTTTTTTTTTTTTTTTTTTTTTTTTTTTT
E1	sc_ligation_RT_49	/5Phos/CAGAGCNNNNNNNNGGTATGCTTGTTTTTTTTTTTTTTTTTTTTTTTTTTTTTT
F1	sc_ligation_RT_61	/5Phos/CAGAGCNNNNNNNNTCGCGGTTGGTTTTTTTTTTTTTTTTTTTTTTTTTTTTTT
G1	sc_ligation_RT_73	/5Phos/CAGAGCNNNNNNNNCATTCAATCATTTTTTTTTTTTTTTTTTTTTTTTTTTTTT
H1	sc_ligation_RT_85	/5Phos/CAGAGCNNNNNNNNAAGCCAGTTATTTTTTTTTTTTTTTTTTTTTTTTTTTTTT
A2	sc_ligation_RT_2	/5Phos/CAGAGCNNNNNNNNGCGTTGGAGCTTTTTTTTTTTTTTTTTTTTTTTTTTTTTT
B2	sc_ligation_RT_14	/5Phos/CAGAGCNNNNNNNNAGAGCTATAATTTTTTTTTTTTTTTTTTTTTTTTTTTTTT
C2	sc_ligation_RT_26	/5Phos/CAGAGCNNNNNNNNCGACGCGACTTTTTTTTTTTTTTTTTTTTTTTTTTTTTTT
D2	sc_ligation_RT_38	/5Phos/CAGAGCNNNNNNNNGAAGATCGAGTTTTTTTTTTTTTTTTTTTTTTTTTTTTTT
E2	sc_ligation_RT_50	/5Phos/CAGAGCNNNNNNNNAACCTGCGTATTTTTTTTTTTTTTTTTTTTTTTTTTTTTT
F2	sc_ligation_RT_62	/5Phos/CAGAGCNNNNNNNNCGTAGTTACCTTTTTTTTTTTTTTTTTTTTTTTTTTTTTT
G2	sc_ligation_RT_74	/5Phos/CAGAGCNNNNNNNNCGGATTAGAATTTTTTTTTTTTTTTTTTTTTTTTTTTTTT
H2	sc_ligation_RT_86	/5Phos/CAGAGCNNNNNNNNTCTTGCCGACTTTTTTTTTTTTTTTTTTTTTTTTTTTTTT
A3	sc_ligation_RT_3	/5Phos/CAGAGCNNNNNNNNGATCTTACGCTTTTTTTTTTTTTTTTTTTTTTTTTTTTTT
B3	sc_ligation_RT_15	/5Phos/CAGAGCNNNNNNNNCTAAGAGAAGTTTTTTTTTTTTTTTTTTTTTTTTTTTTTT
C3	sc_ligation_RT_27	/5Phos/CAGAGCNNNNNNNNGATACGGAACTTTTTTTTTTTTTTTTTTTTTTTTTTTTTT
D3	sc_ligation_RT_39	/5Phos/CAGAGCNNNNNNNNAAGAAGCTAGTTTTTTTTTTTTTTTTTTTTTTTTTTTTTT
E3	sc_ligation_RT_51	/5Phos/CAGAGCNNNNNNNNGGCAGACGCCTTTTTTTTTTTTTTTTTTTTTTTTTTTTTT
F3	sc_ligation_RT_63	/5Phos/CAGAGCNNNNNNNNTCCAATCATCTTTTTTTTTTTTTTTTTTTTTTTTTTTTTT
G3	sc_ligation_RT_75	/5Phos/CAGAGCNNNNNNNNATCGGCTATCTTTTTTTTTTTTTTTTTTTTTTTTTTTTTT
H3	sc_ligation_RT_87	/5Phos/CAGAGCNNNNNNNNAAGACCGTTGTTTTTTTTTTTTTTTTTTTTTTTTTTTTTT
A4	sc_ligation_RT_4	/5Phos/CAGAGCNNNNNNNNCTGATGGTCATTTTTTTTTTTTTTTTTTTTTTTTTTTTTT
B4	sc_ligation_RT_16	/5Phos/CAGAGCNNNNNNNNACTCAATAGGTTTTTTTTTTTTTTTTTTTTTTTTTTTTTT
C4	sc_ligation_RT_28	/5Phos/CAGAGCNNNNNNNNTTATCCGGATTTTTTTTTTTTTTTTTTTTTTTTTTTTTTT
D4	sc_ligation_RT_40	/5Phos/CAGAGCNNNNNNNNTCCGGCCTCGTTTTTTTTTTTTTTTTTTTTTTTTTTTTTT
E4	sc_ligation_RT_52	/5Phos/CAGAGCNNNNNNNNTAGCCGTCATTTTTTTTTTTTTTTTTTTTTTTTTTTTTTT
F4	sc_ligation_RT_64	/5Phos/CAGAGCNNNNNNNNAATCGATAATTTTTTTTTTTTTTTTTTTTTTTTTTTTTTT
G4	sc_ligation_RT_76	/5Phos/CAGAGCNNNNNNNNACGAAGTCAATTTTTTTTTTTTTTTTTTTTTTTTTTTTTT
H4	sc_ligation_RT_88	/5Phos/CAGAGCNNNNNNNNAGGTTAGCATTTTTTTTTTTTTTTTTTTTTTTTTTTTTTT
A5	sc_ligation_RT_5	/5Phos/CAGAGCNNNNNNNNCCGAGAATCCTTTTTTTTTTTTTTTTTTTTTTTTTTTTTT
B5	sc_ligation_RT_17	/5Phos/CAGAGCNNNNNNNNCTTGCGCCGCTTTTTTTTTTTTTTTTTTTTTTTTTTTTTT
C5	sc_ligation_RT_29	/5Phos/CAGAGCNNNNNNNNTAGAGTAATATTTTTTTTTTTTTTTTTTTTTTTTTTTTTT
D5	sc_ligation_RT_41	/5Phos/CAGAGCNNNNNNNNAGAGAAGGTTTTTTTTTTTTTTTTTTTTTTTTTTTTTTTT
E5	sc_ligation_RT_53	/5Phos/CAGAGCNNNNNNNNCTAGTAGTCTTTTTTTTTTTTTTTTTTTTTTTTTTTTTTT
F5	sc_ligation_RT_65	/5Phos/CAGAGCNNNNNNNNCCATTATCTATTTTTTTTTTTTTTTTTTTTTTTTTTTTTT
G5	sc_ligation_RT_77	/5Phos/CAGAGCNNNNNNNNTTACCTCGACTTTTTTTTTTTTTTTTTTTTTTTTTTTTTT
H5	sc_ligation_RT_89	/5Phos/CAGAGCNNNNNNNNTTCGCCTCCATTTTTTTTTTTTTTTTTTTTTTTTTTTTTT
A6	sc_ligation_RT_6	/5Phos/CAGAGCNNNNNNNNGCCGCAACGATTTTTTTTTTTTTTTTTTTTTTTTTTTTTT
B6	sc_ligation_RT_18	/5Phos/CAGAGCNNNNNNNNGGTACTGCCTTTTTTTTTTTTTTTTTTTTTTTTTTTTTTT
C6	sc_ligation_RT_30	/5Phos/CAGAGCNNNNNNNNGCAGGTCCGTTTTTTTTTTTTTTTTTTTTTTTTTTTTTTT
D6	sc_ligation_RT_42	/5Phos/CAGAGCNNNNNNNNCATACTCCGATTTTTTTTTTTTTTTTTTTTTTTTTTTTTT
E6	sc_ligation_RT_54	/5Phos/CAGAGCNNNNNNNNACGCGAGATTTTTTTTTTTTTTTTTTTTTTTTTTTTTTTT
F6	sc_ligation_RT_66	/5Phos/CAGAGCNNNNNNNNTCAACGTAAGTTTTTTTTTTTTTTTTTTTTTTTTTTTTTT
G6	sc_ligation_RT_78	/5Phos/CAGAGCNNNNNNNNGGAGGATAGCTTTTTTTTTTTTTTTTTTTTTTTTTTTTTT
H6	sc_ligation_RT_90	/5Phos/CAGAGCNNNNNNNNAGAGCCAAGGTTTTTTTTTTTTTTTTTTTTTTTTTTTTTT
A7	sc_ligation_RT_7	/5Phos/CAGAGCNNNNNNNNTGAGTCTGGCTTTTTTTTTTTTTTTTTTTTTTTTTTTTTT
B7	sc_ligation_RT_19	/5Phos/CAGAGCNNNNNNNNTAGAATTAACTTTTTTTTTTTTTTTTTTTTTTTTTTTTTT
C7	sc_ligation_RT_31	/5Phos/CAGAGCNNNNNNNNTCGGCCTTACTTTTTTTTTTTTTTTTTTTTTTTTTTTTTT
D7	sc_ligation_RT_43	/5Phos/CAGAGCNNNNNNNNGCTAACTTGCTTTTTTTTTTTTTTTTTTTTTTTTTTTTTT
E7	sc_ligation_RT_55	/5Phos/CAGAGCNNNNNNNNGGTATCCGCCTTTTTTTTTTTTTTTTTTTTTTTTTTTTTT
F7	sc_ligation_RT_67	/5Phos/CAGAGCNNNNNNNNTCTAATAGTATTTTTTTTTTTTTTTTTTTTTTTTTTTTTT
G7	sc_ligation_RT_79	/5Phos/CAGAGCNNNNNNNNGGCTCTCTATTTTTTTTTTTTTTTTTTTTTTTTTTTTTTT
H7	sc_ligation_RT_91	/5Phos/CAGAGCNNNNNNNNAATACCATCCTTTTTTTTTTTTTTTTTTTTTTTTTTTTTT
A8	sc_ligation_RT_8	/5Phos/CAGAGCNNNNNNNNTGCGGACCTATTTTTTTTTTTTTTTTTTTTTTTTTTTTTT
B8	sc_ligation_RT_20	/5Phos/CAGAGCNNNNNNNNGCCATTCTCCTTTTTTTTTTTTTTTTTTTTTTTTTTTTTT
C8	sc_ligation_RT_32	/5Phos/CAGAGCNNNNNNNNAGAACGTCTCTTTTTTTTTTTTTTTTTTTTTTTTTTTTTT
D8	sc_ligation_RT_44	/5Phos/CAGAGCNNNNNNNNGGCTGAGCTCTTTTTTTTTTTTTTTTTTTTTTTTTTTTTT
E8	sc_ligation_RT_56	/5Phos/CAGAGCNNNNNNNNAACTAGGCGCTTTTTTTTTTTTTTTTTTTTTTTTTTTTTT
F8	sc_ligation_RT_68	/5Phos/CAGAGCNNNNNNNNGATCGCTTCTTTTTTTTTTTTTTTTTTTTTTTTTTTTTTT
G8	sc_ligation_RT_80	/5Phos/CAGAGCNNNNNNNNCGGTCAAGAATTTTTTTTTTTTTTTTTTTTTTTTTTTTTT
H8	sc_ligation_RT_92	/5Phos/CAGAGCNNNNNNNNAGCTCTCCTCTTTTTTTTTTTTTTTTTTTTTTTTTTTTTT
A9	sc_ligation_RT_9	/5Phos/CAGAGCNNNNNNNNACGGAGGCGGTTTTTTTTTTTTTTTTTTTTTTTTTTTTTT
B9	sc_ligation_RT_21	/5Phos/CAGAGCNNNNNNNNTGCCGGCAGATTTTTTTTTTTTTTTTTTTTTTTTTTTTTT
C9	sc_ligation_RT_33	/5Phos/CAGAGCNNNNNNNNCCAGTTCCAATTTTTTTTTTTTTTTTTTTTTTTTTTTTTT
D9	sc_ligation_RT_45	/5Phos/CAGAGCNNNNNNNNCCGATTCCTGTTTTTTTTTTTTTTTTTTTTTTTTTTTTTT
E9	sc_ligation_RT_57	/5Phos/CAGAGCNNNNNNNNTCGCTAAGCATTTTTTTTTTTTTTTTTTTTTTTTTTTTTT
F9	sc_ligation_RT_69	/5Phos/CAGAGCNNNNNNNNCTAACTAGATTTTTTTTTTTTTTTTTTTTTTTTTTTTTTT
G9	sc_ligation_RT_81	/5Phos/CAGAGCNNNNNNNNCGCTCCTAACTTTTTTTTTTTTTTTTTTTTTTTTTTTTTT
H9	sc_ligation_RT_93	/5Phos/CAGAGCNNNNNNNNAGCTTATCCGTTTTTTTTTTTTTTTTTTTTTTTTTTTTTT
A10	sc_ligation_RT_10	/5Phos/CAGAGCNNNNNNNNTAGATCTACTTTTTTTTTTTTTTTTTTTTTTTTTTTTTTT
B10	sc_ligation_RT_22	/5Phos/CAGAGCNNNNNNNNTTACCGAGGCTTTTTTTTTTTTTTTTTTTTTTTTTTTTTT
C10	sc_ligation_RT_34	/5Phos/CAGAGCNNNNNNNNACTTAACCTTTTTTTTTTTTTTTTTTTTTTTTTTTTTTTT
D10	sc_ligation_RT_46	/5Phos/CAGAGCNNNNNNNNACCGCCAACCTTTTTTTTTTTTTTTTTTTTTTTTTTTTTT
E10	sc_ligation_RT_58	/5Phos/CAGAGCNNNNNNNNTATATACTAATTTTTTTTTTTTTTTTTTTTTTTTTTTTTT
F10	sc_ligation_RT_70	/5Phos/CAGAGCNNNNNNNNGCTGGAACTTTTTTTTTTTTTTTTTTTTTTTTTTTTTTTT
G10	sc_ligation_RT_82	/5Phos/CAGAGCNNNNNNNNATCCATGACTTTTTTTTTTTTTTTTTTTTTTTTTTTTTTT
H10	sc_ligation_RT_94	/5Phos/CAGAGCNNNNNNNNCATCTCTGCATTTTTTTTTTTTTTTTTTTTTTTTTTTTTT
A11	sc_ligation_RT_11	/5Phos/CAGAGCNNNNNNNNAATTAAGACTTTTTTTTTTTTTTTTTTTTTTTTTTTTTTT
B11	sc_ligation_RT_23	/5Phos/CAGAGCNNNNNNNNATCATATTAGTTTTTTTTTTTTTTTTTTTTTTTTTTTTTT
C11	sc_ligation_RT_35	/5Phos/CAGAGCNNNNNNNNCAACCGCTAATTTTTTTTTTTTTTTTTTTTTTTTTTTTTT
D11	sc_ligation_RT_47	/5Phos/CAGAGCNNNNNNNNATAAGGAGCATTTTTTTTTTTTTTTTTTTTTTTTTTTTTT
E11	sc_ligation_RT_59	/5Phos/CAGAGCNNNNNNNNACTTGCTAGATTTTTTTTTTTTTTTTTTTTTTTTTTTTTT
F11	sc_ligation_RT_71	/5Phos/CAGAGCNNNNNNNNAGGTTAGTTCTTTTTTTTTTTTTTTTTTTTTTTTTTTTTT
G11	sc_ligation_RT_83	/5Phos/CAGAGCNNNNNNNNAACCTGGTCTTTTTTTTTTTTTTTTTTTTTTTTTTTTTTT
H11	sc_ligation_RT_95	/5Phos/CAGAGCNNNNNNNNACCTGGCCAATTTTTTTTTTTTTTTTTTTTTTTTTTTTTT
A12	sc_ligation_RT_12	/5Phos/CAGAGCNNNNNNNNTTATTCATTCTTTTTTTTTTTTTTTTTTTTTTTTTTTTTT
B12	sc_ligation_RT_24	/5Phos/CAGAGCNNNNNNNNTGGTCAGCCATTTTTTTTTTTTTTTTTTTTTTTTTTTTTT
C12	sc_ligation_RT_36	/5Phos/CAGAGCNNNNNNNNGACCTTGATATTTTTTTTTTTTTTTTTTTTTTTTTTTTTT
D12	sc_ligation_RT_48	/5Phos/CAGAGCNNNNNNNNCGAACGCCGGTTTTTTTTTTTTTTTTTTTTTTTTTTTTTT
E12	sc_ligation_RT_60	/5Phos/CAGAGCNNNNNNNNAACCATTGGATTTTTTTTTTTTTTTTTTTTTTTTTTTTTT
F12	sc_ligation_RT_72	/5Phos/CAGAGCNNNNNNNNCATTCGACGGTTTTTTTTTTTTTTTTTTTTTTTTTTTTTT
G12	sc_ligation_RT_84	/5Phos/CAGAGCNNNNNNNNGGTACCGGCATTTTTTTTTTTTTTTTTTTTTTTTTTTTTT
H12	sc_ligation_RT_96	/5Phos/CAGAGCNNNNNNNNTAACTGGTTATTTTTTTTTTTTTTTTTTTTTTTTTTTTTT

## Sheet: 3lvl_mRNA_RT_plate_2
Well Position	Name	Sequence
A1	sc_ligation_RT_97	/5Phos/CAGAGCNNNNNNNNTTGCTAACGGTTTTTTTTTTTTTTTTTTTTTTTTTTTTTT
B1	sc_ligation_RT_109	/5Phos/CAGAGCNNNNNNNNCCGTTCCTTATTTTTTTTTTTTTTTTTTTTTTTTTTTTTT
C1	sc_ligation_RT_121	/5Phos/CAGAGCNNNNNNNNACGTCCGCAGTTTTTTTTTTTTTTTTTTTTTTTTTTTTTT
D1	sc_ligation_RT_133	/5Phos/CAGAGCNNNNNNNNTAGGCCATAGTTTTTTTTTTTTTTTTTTTTTTTTTTTTTT
E1	sc_ligation_RT_145	/5Phos/CAGAGCNNNNNNNNCCGCTCCGGCTTTTTTTTTTTTTTTTTTTTTTTTTTTTTT
F1	sc_ligation_RT_157	/5Phos/CAGAGCNNNNNNNNTTACGATGAATTTTTTTTTTTTTTTTTTTTTTTTTTTTTT
G1	sc_ligation_RT_169	/5Phos/CAGAGCNNNNNNNNGACGAAGCGTTTTTTTTTTTTTTTTTTTTTTTTTTTTTTT
H1	sc_ligation_RT_181	/5Phos/CAGAGCNNNNNNNNGATATCGGCGTTTTTTTTTTTTTTTTTTTTTTTTTTTTTT
A2	sc_ligation_RT_98	/5Phos/CAGAGCNNNNNNNNACTAGAGAGTTTTTTTTTTTTTTTTTTTTTTTTTTTTTTT
B2	sc_ligation_RT_110	/5Phos/CAGAGCNNNNNNNNATGGCTCTGCTTTTTTTTTTTTTTTTTTTTTTTTTTTTTT
C2	sc_ligation_RT_122	/5Phos/CAGAGCNNNNNNNNTTGCGAGGCATTTTTTTTTTTTTTTTTTTTTTTTTTTTTT
D2	sc_ligation_RT_134	/5Phos/CAGAGCNNNNNNNNTAACTCTTAGTTTTTTTTTTTTTTTTTTTTTTTTTTTTTT
E2	sc_ligation_RT_146	/5Phos/CAGAGCNNNNNNNNTTCTTCCGGTTTTTTTTTTTTTTTTTTTTTTTTTTTTTTT
F2	sc_ligation_RT_158	/5Phos/CAGAGCNNNNNNNNTTGCTGGCATTTTTTTTTTTTTTTTTTTTTTTTTTTTTTT
G2	sc_ligation_RT_170	/5Phos/CAGAGCNNNNNNNNCTTGCAGTAGTTTTTTTTTTTTTTTTTTTTTTTTTTTTTT
H2	sc_ligation_RT_182	/5Phos/CAGAGCNNNNNNNNCCAGTCCTCTTTTTTTTTTTTTTTTTTTTTTTTTTTTTTT
A3	sc_ligation_RT_99	/5Phos/CAGAGCNNNNNNNNAATGCCGCTTTTTTTTTTTTTTTTTTTTTTTTTTTTTTTT
B3	sc_ligation_RT_111	/5Phos/CAGAGCNNNNNNNNGTATAATACGTTTTTTTTTTTTTTTTTTTTTTTTTTTTTT
C3	sc_ligation_RT_123	/5Phos/CAGAGCNNNNNNNNTTCCAACCGCTTTTTTTTTTTTTTTTTTTTTTTTTTTTTT
D3	sc_ligation_RT_135	/5Phos/CAGAGCNNNNNNNNTATGAGTTAATTTTTTTTTTTTTTTTTTTTTTTTTTTTTT
E3	sc_ligation_RT_147	/5Phos/CAGAGCNNNNNNNNAGGAGAGAACTTTTTTTTTTTTTTTTTTTTTTTTTTTTTT
F3	sc_ligation_RT_159	/5Phos/CAGAGCNNNNNNNNATTCGACCAATTTTTTTTTTTTTTTTTTTTTTTTTTTTTT
G3	sc_ligation_RT_171	/5Phos/CAGAGCNNNNNNNNCTTGGTAATGTTTTTTTTTTTTTTTTTTTTTTTTTTTTTT
H3	sc_ligation_RT_183	/5Phos/CAGAGCNNNNNNNNCATAGTTCGGTTTTTTTTTTTTTTTTTTTTTTTTTTTTTT
A4	sc_ligation_RT_100	/5Phos/CAGAGCNNNNNNNNTATAGACGCATTTTTTTTTTTTTTTTTTTTTTTTTTTTTT
B4	sc_ligation_RT_112	/5Phos/CAGAGCNNNNNNNNGGCGAACTCGTTTTTTTTTTTTTTTTTTTTTTTTTTTTTT
C4	sc_ligation_RT_124	/5Phos/CAGAGCNNNNNNNNTCAAGCCGATTTTTTTTTTTTTTTTTTTTTTTTTTTTTTT
D4	sc_ligation_RT_136	/5Phos/CAGAGCNNNNNNNNTATCATGATCTTTTTTTTTTTTTTTTTTTTTTTTTTTTTT
E4	sc_ligation_RT_148	/5Phos/CAGAGCNNNNNNNNTAACTCAATTTTTTTTTTTTTTTTTTTTTTTTTTTTTTTT
F4	sc_ligation_RT_160	/5Phos/CAGAGCNNNNNNNNCCGCGGCTCATTTTTTTTTTTTTTTTTTTTTTTTTTTTTT
G4	sc_ligation_RT_172	/5Phos/CAGAGCNNNNNNNNCAAGTCGACCTTTTTTTTTTTTTTTTTTTTTTTTTTTTTT
H4	sc_ligation_RT_184	/5Phos/CAGAGCNNNNNNNNCGTAATGCAGTTTTTTTTTTTTTTTTTTTTTTTTTTTTTT
A5	sc_ligation_RT_101	/5Phos/CAGAGCNNNNNNNNTCAATCGCATTTTTTTTTTTTTTTTTTTTTTTTTTTTTTT
B5	sc_ligation_RT_113	/5Phos/CAGAGCNNNNNNNNTTAATTGAATTTTTTTTTTTTTTTTTTTTTTTTTTTTTTT
C5	sc_ligation_RT_125	/5Phos/CAGAGCNNNNNNNNCTTGCAACCTTTTTTTTTTTTTTTTTTTTTTTTTTTTTTT
D5	sc_ligation_RT_137	/5Phos/CAGAGCNNNNNNNNGAGCATATGGTTTTTTTTTTTTTTTTTTTTTTTTTTTTTT
E5	sc_ligation_RT_149	/5Phos/CAGAGCNNNNNNNNACTATAGGTTTTTTTTTTTTTTTTTTTTTTTTTTTTTTTT
F5	sc_ligation_RT_161	/5Phos/CAGAGCNNNNNNNNGTTACGCAAGTTTTTTTTTTTTTTTTTTTTTTTTTTTTTT
G5	sc_ligation_RT_173	/5Phos/CAGAGCNNNNNNNNTAACGAATTGTTTTTTTTTTTTTTTTTTTTTTTTTTTTTT
H5	sc_ligation_RT_185	/5Phos/CAGAGCNNNNNNNNCCGTTCGGATTTTTTTTTTTTTTTTTTTTTTTTTTTTTTT
A6	sc_ligation_RT_102	/5Phos/CAGAGCNNNNNNNNTTCTTAATAATTTTTTTTTTTTTTTTTTTTTTTTTTTTTT
B6	sc_ligation_RT_114	/5Phos/CAGAGCNNNNNNNNTTAGGACCGGTTTTTTTTTTTTTTTTTTTTTTTTTTTTTT
C6	sc_ligation_RT_126	/5Phos/CAGAGCNNNNNNNNCCATCGCGAATTTTTTTTTTTTTTTTTTTTTTTTTTTTTT
D6	sc_ligation_RT_138	/5Phos/CAGAGCNNNNNNNNTAACGATCCATTTTTTTTTTTTTTTTTTTTTTTTTTTTTT
E6	sc_ligation_RT_150	/5Phos/CAGAGCNNNNNNNNAGGTATACTCTTTTTTTTTTTTTTTTTTTTTTTTTTTTTT
F6	sc_ligation_RT_162	/5Phos/CAGAGCNNNNNNNNAGCCGGTACCTTTTTTTTTTTTTTTTTTTTTTTTTTTTTT
G6	sc_ligation_RT_174	/5Phos/CAGAGCNNNNNNNNTTATTCTGAGTTTTTTTTTTTTTTTTTTTTTTTTTTTTTT
H6	sc_ligation_RT_186	/5Phos/CAGAGCNNNNNNNNCCATAAGTCCTTTTTTTTTTTTTTTTTTTTTTTTTTTTTT
A7	sc_ligation_RT_103	/5Phos/CAGAGCNNNNNNNNGTCCTAGAGGTTTTTTTTTTTTTTTTTTTTTTTTTTTTTT
B7	sc_ligation_RT_115	/5Phos/CAGAGCNNNNNNNNAAGTAAGAGCTTTTTTTTTTTTTTTTTTTTTTTTTTTTTT
C7	sc_ligation_RT_127	/5Phos/CAGAGCNNNNNNNNTAGACTTCTTTTTTTTTTTTTTTTTTTTTTTTTTTTTTTT
D7	sc_ligation_RT_139	/5Phos/CAGAGCNNNNNNNNCGGCGTAACTTTTTTTTTTTTTTTTTTTTTTTTTTTTTTT
E7	sc_ligation_RT_151	/5Phos/CAGAGCNNNNNNNNTTCATAGGACTTTTTTTTTTTTTTTTTTTTTTTTTTTTTT
F7	sc_ligation_RT_163	/5Phos/CAGAGCNNNNNNNNACCTCTATCTTTTTTTTTTTTTTTTTTTTTTTTTTTTTTT
G7	sc_ligation_RT_175	/5Phos/CAGAGCNNNNNNNNTTATTATGGTTTTTTTTTTTTTTTTTTTTTTTTTTTTTTT
H7	sc_ligation_RT_187	/5Phos/CAGAGCNNNNNNNNGGCAATGAGATTTTTTTTTTTTTTTTTTTTTTTTTTTTTT
A8	sc_ligation_RT_104	/5Phos/CAGAGCNNNNNNNNATATTGATACTTTTTTTTTTTTTTTTTTTTTTTTTTTTTT
B8	sc_ligation_RT_116	/5Phos/CAGAGCNNNNNNNNCCTTGGTCCATTTTTTTTTTTTTTTTTTTTTTTTTTTTTT
C8	sc_ligation_RT_128	/5Phos/CAGAGCNNNNNNNNGTCCTTAAGATTTTTTTTTTTTTTTTTTTTTTTTTTTTTT
D8	sc_ligation_RT_140	/5Phos/CAGAGCNNNNNNNNCGTCGCAGCCTTTTTTTTTTTTTTTTTTTTTTTTTTTTTT
E8	sc_ligation_RT_152	/5Phos/CAGAGCNNNNNNNNGGAGGCCTCCTTTTTTTTTTTTTTTTTTTTTTTTTTTTTT
F8	sc_ligation_RT_164	/5Phos/CAGAGCNNNNNNNNGGACTACTACTTTTTTTTTTTTTTTTTTTTTTTTTTTTTT
G8	sc_ligation_RT_176	/5Phos/CAGAGCNNNNNNNNATATGAGCCATTTTTTTTTTTTTTTTTTTTTTTTTTTTTT
H8	sc_ligation_RT_188	/5Phos/CAGAGCNNNNNNNNCGGTTATGCCTTTTTTTTTTTTTTTTTTTTTTTTTTTTTT
A9	sc_ligation_RT_105	/5Phos/CAGAGCNNNNNNNNCCGCTGCCAGTTTTTTTTTTTTTTTTTTTTTTTTTTTTTT
B9	sc_ligation_RT_117	/5Phos/CAGAGCNNNNNNNNCATCAGAATGTTTTTTTTTTTTTTTTTTTTTTTTTTTTTT
C9	sc_ligation_RT_129	/5Phos/CAGAGCNNNNNNNNAGTAACGGTCTTTTTTTTTTTTTTTTTTTTTTTTTTTTTT
D9	sc_ligation_RT_141	/5Phos/CAGAGCNNNNNNNNGTAGCTCCATTTTTTTTTTTTTTTTTTTTTTTTTTTTTTT
E9	sc_ligation_RT_153	/5Phos/CAGAGCNNNNNNNNTTCAATATAATTTTTTTTTTTTTTTTTTTTTTTTTTTTTT
F9	sc_ligation_RT_165	/5Phos/CAGAGCNNNNNNNNGTATCATCGATTTTTTTTTTTTTTTTTTTTTTTTTTTTTT
G9	sc_ligation_RT_177	/5Phos/CAGAGCNNNNNNNNCAACCAGTACTTTTTTTTTTTTTTTTTTTTTTTTTTTTTT
H9	sc_ligation_RT_189	/5Phos/CAGAGCNNNNNNNNTGGCCGGCCTTTTTTTTTTTTTTTTTTTTTTTTTTTTTTT
A10	sc_ligation_RT_106	/5Phos/CAGAGCNNNNNNNNCAATTACCGTTTTTTTTTTTTTTTTTTTTTTTTTTTTTTT
B10	sc_ligation_RT_118	/5Phos/CAGAGCNNNNNNNNTTATAGCAGATTTTTTTTTTTTTTTTTTTTTTTTTTTTTT
C10	sc_ligation_RT_130	/5Phos/CAGAGCNNNNNNNNGTTCGTCAGATTTTTTTTTTTTTTTTTTTTTTTTTTTTTT
D10	sc_ligation_RT_142	/5Phos/CAGAGCNNNNNNNNGTCCTACTTGTTTTTTTTTTTTTTTTTTTTTTTTTTTTTT
E10	sc_ligation_RT_154	/5Phos/CAGAGCNNNNNNNNACGTCATATATTTTTTTTTTTTTTTTTTTTTTTTTTTTTT
F10	sc_ligation_RT_166	/5Phos/CAGAGCNNNNNNNNCCGCGATTATTTTTTTTTTTTTTTTTTTTTTTTTTTTTTT
G10	sc_ligation_RT_178	/5Phos/CAGAGCNNNNNNNNCATCCGACTATTTTTTTTTTTTTTTTTTTTTTTTTTTTTT
H10	sc_ligation_RT_190	/5Phos/CAGAGCNNNNNNNNAGCTGCAATATTTTTTTTTTTTTTTTTTTTTTTTTTTTTT
A11	sc_ligation_RT_107	/5Phos/CAGAGCNNNNNNNNGGCCGTAGTCTTTTTTTTTTTTTTTTTTTTTTTTTTTTTT
B11	sc_ligation_RT_119	/5Phos/CAGAGCNNNNNNNNTTACTTGGAATTTTTTTTTTTTTTTTTTTTTTTTTTTTTT
C11	sc_ligation_RT_131	/5Phos/CAGAGCNNNNNNNNCGCCTAATGCTTTTTTTTTTTTTTTTTTTTTTTTTTTTTT
D11	sc_ligation_RT_143	/5Phos/CAGAGCNNNNNNNNGGTAGGTTAGTTTTTTTTTTTTTTTTTTTTTTTTTTTTTT
E11	sc_ligation_RT_155	/5Phos/CAGAGCNNNNNNNNCGGTTGCGCGTTTTTTTTTTTTTTTTTTTTTTTTTTTTTT
F11	sc_ligation_RT_167	/5Phos/CAGAGCNNNNNNNNATTCAGGTACTTTTTTTTTTTTTTTTTTTTTTTTTTTTTT
G11	sc_ligation_RT_179	/5Phos/CAGAGCNNNNNNNNCCGCAAGTTCTTTTTTTTTTTTTTTTTTTTTTTTTTTTTT
H11	sc_ligation_RT_191	/5Phos/CAGAGCNNNNNNNNTGGCCATGCATTTTTTTTTTTTTTTTTTTTTTTTTTTTTT
A12	sc_ligation_RT_108	/5Phos/CAGAGCNNNNNNNNTAATGAACGATTTTTTTTTTTTTTTTTTTTTTTTTTTTTT
B12	sc_ligation_RT_120	/5Phos/CAGAGCNNNNNNNNGCTCAGCCGGTTTTTTTTTTTTTTTTTTTTTTTTTTTTTT
C12	sc_ligation_RT_132	/5Phos/CAGAGCNNNNNNNNACCGGAATTATTTTTTTTTTTTTTTTTTTTTTTTTTTTTT
D12	sc_ligation_RT_144	/5Phos/CAGAGCNNNNNNNNGAGCATCATTTTTTTTTTTTTTTTTTTTTTTTTTTTTTTT
E12	sc_ligation_RT_156	/5Phos/CAGAGCNNNNNNNNCAAGGAGGTCTTTTTTTTTTTTTTTTTTTTTTTTTTTTTT
F12	sc_ligation_RT_168	/5Phos/CAGAGCNNNNNNNNATGGAATTGGTTTTTTTTTTTTTTTTTTTTTTTTTTTTTT
G12	sc_ligation_RT_180	/5Phos/CAGAGCNNNNNNNNCAGGAGGAGATTTTTTTTTTTTTTTTTTTTTTTTTTTTTT
H12	sc_ligation_RT_192	/5Phos/CAGAGCNNNNNNNNTGACGCTCCGTTTTTTTTTTTTTTTTTTTTTTTTTTTTTT

## Sheet: 3lvl_mRNA_RT_plate_3
Well Position	Name	Sequence
A1	sc_ligation_RT_193	/5Phos/CAGAGCNNNNNNNNAACTGCTGCCTTTTTTTTTTTTTTTTTTTTTTTTTTTTTT
B1	sc_ligation_RT_205	/5Phos/CAGAGCNNNNNNNNCTCTGATCAGTTTTTTTTTTTTTTTTTTTTTTTTTTTTTT
C1	sc_ligation_RT_217	/5Phos/CAGAGCNNNNNNNNGGAGCGGCCGTTTTTTTTTTTTTTTTTTTTTTTTTTTTTT
D1	sc_ligation_RT_229	/5Phos/CAGAGCNNNNNNNNTATCCTCAATTTTTTTTTTTTTTTTTTTTTTTTTTTTTTT
E1	sc_ligation_RT_241	/5Phos/CAGAGCNNNNNNNNCGGATGAAGGTTTTTTTTTTTTTTTTTTTTTTTTTTTTTT
F1	sc_ligation_RT_253	/5Phos/CAGAGCNNNNNNNNACCTGGACGCTTTTTTTTTTTTTTTTTTTTTTTTTTTTTT
G1	sc_ligation_RT_265	/5Phos/CAGAGCNNNNNNNNTCAGCTCTAATTTTTTTTTTTTTTTTTTTTTTTTTTTTTT
H1	sc_ligation_RT_277	/5Phos/CAGAGCNNNNNNNNTGGAGAATTCTTTTTTTTTTTTTTTTTTTTTTTTTTTTTT
A2	sc_ligation_RT_194	/5Phos/CAGAGCNNNNNNNNTGCGCGATGCTTTTTTTTTTTTTTTTTTTTTTTTTTTTTT
B2	sc_ligation_RT_206	/5Phos/CAGAGCNNNNNNNNGGCCAGTCCGTTTTTTTTTTTTTTTTTTTTTTTTTTTTTT
C2	sc_ligation_RT_218	/5Phos/CAGAGCNNNNNNNNCGCGTACGACTTTTTTTTTTTTTTTTTTTTTTTTTTTTTT
D2	sc_ligation_RT_230	/5Phos/CAGAGCNNNNNNNNGCCGTCGCGTTTTTTTTTTTTTTTTTTTTTTTTTTTTTTT
E2	sc_ligation_RT_242	/5Phos/CAGAGCNNNNNNNNTATCGTCGGCTTTTTTTTTTTTTTTTTTTTTTTTTTTTTT
F2	sc_ligation_RT_254	/5Phos/CAGAGCNNNNNNNNGCGTTCAGCTTTTTTTTTTTTTTTTTTTTTTTTTTTTTTT
G2	sc_ligation_RT_266	/5Phos/CAGAGCNNNNNNNNCGAATAGATGTTTTTTTTTTTTTTTTTTTTTTTTTTTTTT
H2	sc_ligation_RT_278	/5Phos/CAGAGCNNNNNNNNGGCGAGCTTATTTTTTTTTTTTTTTTTTTTTTTTTTTTTT
A3	sc_ligation_RT_195	/5Phos/CAGAGCNNNNNNNNATTGAGATTGTTTTTTTTTTTTTTTTTTTTTTTTTTTTTT
B3	sc_ligation_RT_207	/5Phos/CAGAGCNNNNNNNNCGGAAGATATTTTTTTTTTTTTTTTTTTTTTTTTTTTTTT
C3	sc_ligation_RT_219	/5Phos/CAGAGCNNNNNNNNCGATGGCGCCTTTTTTTTTTTTTTTTTTTTTTTTTTTTTT
D3	sc_ligation_RT_231	/5Phos/CAGAGCNNNNNNNNAATGCTAGTCTTTTTTTTTTTTTTTTTTTTTTTTTTTTTT
E3	sc_ligation_RT_243	/5Phos/CAGAGCNNNNNNNNGCCGTATGCTTTTTTTTTTTTTTTTTTTTTTTTTTTTTTT
F3	sc_ligation_RT_255	/5Phos/CAGAGCNNNNNNNNTTAGCAATAATTTTTTTTTTTTTTTTTTTTTTTTTTTTTT
G3	sc_ligation_RT_267	/5Phos/CAGAGCNNNNNNNNCGGAGATCCGTTTTTTTTTTTTTTTTTTTTTTTTTTTTTT
H3	sc_ligation_RT_279	/5Phos/CAGAGCNNNNNNNNTCGAGGAGTATTTTTTTTTTTTTTTTTTTTTTTTTTTTTT
A4	sc_ligation_RT_196	/5Phos/CAGAGCNNNNNNNNTTGATATATTTTTTTTTTTTTTTTTTTTTTTTTTTTTTTT
B4	sc_ligation_RT_208	/5Phos/CAGAGCNNNNNNNNTGGCTGATGATTTTTTTTTTTTTTTTTTTTTTTTTTTTTT
C4	sc_ligation_RT_220	/5Phos/CAGAGCNNNNNNNNTGGTATTCATTTTTTTTTTTTTTTTTTTTTTTTTTTTTTT
D4	sc_ligation_RT_232	/5Phos/CAGAGCNNNNNNNNGACGACCTGCTTTTTTTTTTTTTTTTTTTTTTTTTTTTTT
E4	sc_ligation_RT_244	/5Phos/CAGAGCNNNNNNNNCTGAACTGGTTTTTTTTTTTTTTTTTTTTTTTTTTTTTTT
F4	sc_ligation_RT_256	/5Phos/CAGAGCNNNNNNNNTTGATGCTATTTTTTTTTTTTTTTTTTTTTTTTTTTTTTT
G4	sc_ligation_RT_268	/5Phos/CAGAGCNNNNNNNNACCGCAGAATTTTTTTTTTTTTTTTTTTTTTTTTTTTTTT
H4	sc_ligation_RT_280	/5Phos/CAGAGCNNNNNNNNCCTTACTCCTTTTTTTTTTTTTTTTTTTTTTTTTTTTTTT
A5	sc_ligation_RT_197	/5Phos/CAGAGCNNNNNNNNCGGTAGGAATTTTTTTTTTTTTTTTTTTTTTTTTTTTTTT
B5	sc_ligation_RT_209	/5Phos/CAGAGCNNNNNNNNGAAGGTTGCCTTTTTTTTTTTTTTTTTTTTTTTTTTTTTT
C5	sc_ligation_RT_221	/5Phos/CAGAGCNNNNNNNNGATAAGGCAATTTTTTTTTTTTTTTTTTTTTTTTTTTTTT
D5	sc_ligation_RT_233	/5Phos/CAGAGCNNNNNNNNAGAGCCAGCCTTTTTTTTTTTTTTTTTTTTTTTTTTTTTT
E5	sc_ligation_RT_245	/5Phos/CAGAGCNNNNNNNNCATAACCAGCTTTTTTTTTTTTTTTTTTTTTTTTTTTTTT
F5	sc_ligation_RT_257	/5Phos/CAGAGCNNNNNNNNCTCTGCGGCATTTTTTTTTTTTTTTTTTTTTTTTTTTTTT
G5	sc_ligation_RT_269	/5Phos/CAGAGCNNNNNNNNTCTCCTATAATTTTTTTTTTTTTTTTTTTTTTTTTTTTTT
H5	sc_ligation_RT_281	/5Phos/CAGAGCNNNNNNNNTCAGACGAACTTTTTTTTTTTTTTTTTTTTTTTTTTTTTT
A6	sc_ligation_RT_198	/5Phos/CAGAGCNNNNNNNNACCAGCGCAGTTTTTTTTTTTTTTTTTTTTTTTTTTTTTT
B6	sc_ligation_RT_210	/5Phos/CAGAGCNNNNNNNNGTTGAAGGATTTTTTTTTTTTTTTTTTTTTTTTTTTTTTT
C6	sc_ligation_RT_222	/5Phos/CAGAGCNNNNNNNNGCCGGTCGAGTTTTTTTTTTTTTTTTTTTTTTTTTTTTTT
D6	sc_ligation_RT_234	/5Phos/CAGAGCNNNNNNNNCCAGGCCGCATTTTTTTTTTTTTTTTTTTTTTTTTTTTTT
E6	sc_ligation_RT_246	/5Phos/CAGAGCNNNNNNNNAAGTTGCCATTTTTTTTTTTTTTTTTTTTTTTTTTTTTTT
F6	sc_ligation_RT_258	/5Phos/CAGAGCNNNNNNNNAATAATACCATTTTTTTTTTTTTTTTTTTTTTTTTTTTTT
G6	sc_ligation_RT_270	/5Phos/CAGAGCNNNNNNNNAAGACGGCCATTTTTTTTTTTTTTTTTTTTTTTTTTTTTT
H6	sc_ligation_RT_282	/5Phos/CAGAGCNNNNNNNNCCGTCCAGTATTTTTTTTTTTTTTTTTTTTTTTTTTTTTT
A7	sc_ligation_RT_199	/5Phos/CAGAGCNNNNNNNNAGTTCGAGTATTTTTTTTTTTTTTTTTTTTTTTTTTTTTT
B7	sc_ligation_RT_211	/5Phos/CAGAGCNNNNNNNNTGCGCCAGAATTTTTTTTTTTTTTTTTTTTTTTTTTTTTT
C7	sc_ligation_RT_223	/5Phos/CAGAGCNNNNNNNNTGCGCCATCTTTTTTTTTTTTTTTTTTTTTTTTTTTTTTT
D7	sc_ligation_RT_235	/5Phos/CAGAGCNNNNNNNNCAGGTATGGATTTTTTTTTTTTTTTTTTTTTTTTTTTTTT
E7	sc_ligation_RT_247	/5Phos/CAGAGCNNNNNNNNAGGCCGCTCGTTTTTTTTTTTTTTTTTTTTTTTTTTTTTT
F7	sc_ligation_RT_259	/5Phos/CAGAGCNNNNNNNNACGCCGTTCATTTTTTTTTTTTTTTTTTTTTTTTTTTTTT
G7	sc_ligation_RT_271	/5Phos/CAGAGCNNNNNNNNGCCAACGCCATTTTTTTTTTTTTTTTTTTTTTTTTTTTTT
H7	sc_ligation_RT_283	/5Phos/CAGAGCNNNNNNNNGTTCCGCTAATTTTTTTTTTTTTTTTTTTTTTTTTTTTTT
A8	sc_ligation_RT_200	/5Phos/CAGAGCNNNNNNNNTTGGACGCTGTTTTTTTTTTTTTTTTTTTTTTTTTTTTTT
B8	sc_ligation_RT_212	/5Phos/CAGAGCNNNNNNNNCGAATAATTCTTTTTTTTTTTTTTTTTTTTTTTTTTTTTT
C8	sc_ligation_RT_224	/5Phos/CAGAGCNNNNNNNNAAGTCTTCCGTTTTTTTTTTTTTTTTTTTTTTTTTTTTTT
D8	sc_ligation_RT_236	/5Phos/CAGAGCNNNNNNNNTTAATTATTGTTTTTTTTTTTTTTTTTTTTTTTTTTTTTT
E8	sc_ligation_RT_248	/5Phos/CAGAGCNNNNNNNNGTACTAGTAATTTTTTTTTTTTTTTTTTTTTTTTTTTTTT
F8	sc_ligation_RT_260	/5Phos/CAGAGCNNNNNNNNTTCGCTTACGTTTTTTTTTTTTTTTTTTTTTTTTTTTTTT
G8	sc_ligation_RT_272	/5Phos/CAGAGCNNNNNNNNTCTACCATTATTTTTTTTTTTTTTTTTTTTTTTTTTTTTT
H8	sc_ligation_RT_284	/5Phos/CAGAGCNNNNNNNNCAGATTCGATTTTTTTTTTTTTTTTTTTTTTTTTTTTTTT
A9	sc_ligation_RT_201	/5Phos/CAGAGCNNNNNNNNATAGACTAGGTTTTTTTTTTTTTTTTTTTTTTTTTTTTTT
B9	sc_ligation_RT_213	/5Phos/CAGAGCNNNNNNNNGCGACGCCTTTTTTTTTTTTTTTTTTTTTTTTTTTTTTTT
C9	sc_ligation_RT_225	/5Phos/CAGAGCNNNNNNNNAGACTCAAGCTTTTTTTTTTTTTTTTTTTTTTTTTTTTTT
D9	sc_ligation_RT_237	/5Phos/CAGAGCNNNNNNNNCCGTTGACTTTTTTTTTTTTTTTTTTTTTTTTTTTTTTTT
E9	sc_ligation_RT_249	/5Phos/CAGAGCNNNNNNNNGCGCGGTAGTTTTTTTTTTTTTTTTTTTTTTTTTTTTTTT
F9	sc_ligation_RT_261	/5Phos/CAGAGCNNNNNNNNTACGGCTACGTTTTTTTTTTTTTTTTTTTTTTTTTTTTTT
G9	sc_ligation_RT_273	/5Phos/CAGAGCNNNNNNNNTTACGTATACTTTTTTTTTTTTTTTTTTTTTTTTTTTTTT
H9	sc_ligation_RT_285	/5Phos/CAGAGCNNNNNNNNTGCATATAACTTTTTTTTTTTTTTTTTTTTTTTTTTTTTT
A10	sc_ligation_RT_202	/5Phos/CAGAGCNNNNNNNNTATAGTAAGCTTTTTTTTTTTTTTTTTTTTTTTTTTTTTT
B10	sc_ligation_RT_214	/5Phos/CAGAGCNNNNNNNNATCAACGATTTTTTTTTTTTTTTTTTTTTTTTTTTTTTTT
C10	sc_ligation_RT_226	/5Phos/CAGAGCNNNNNNNNGCAGGCGACGTTTTTTTTTTTTTTTTTTTTTTTTTTTTTT
D10	sc_ligation_RT_238	/5Phos/CAGAGCNNNNNNNNGCCAGGATCATTTTTTTTTTTTTTTTTTTTTTTTTTTTTT
E10	sc_ligation_RT_250	/5Phos/CAGAGCNNNNNNNNCTGGATTAGTTTTTTTTTTTTTTTTTTTTTTTTTTTTTTT
F10	sc_ligation_RT_262	/5Phos/CAGAGCNNNNNNNNTTCTTATCGATTTTTTTTTTTTTTTTTTTTTTTTTTTTTT
G10	sc_ligation_RT_274	/5Phos/CAGAGCNNNNNNNNACTTAACTAGTTTTTTTTTTTTTTTTTTTTTTTTTTTTTT
H10	sc_ligation_RT_286	/5Phos/CAGAGCNNNNNNNNTAGGCAGATATTTTTTTTTTTTTTTTTTTTTTTTTTTTTT
A11	sc_ligation_RT_203	/5Phos/CAGAGCNNNNNNNNCGGTCGTTAATTTTTTTTTTTTTTTTTTTTTTTTTTTTTT
B11	sc_ligation_RT_215	/5Phos/CAGAGCNNNNNNNNGTTCTGAATTTTTTTTTTTTTTTTTTTTTTTTTTTTTTTT
C11	sc_ligation_RT_227	/5Phos/CAGAGCNNNNNNNNAATACTCTTCTTTTTTTTTTTTTTTTTTTTTTTTTTTTTT
D11	sc_ligation_RT_239	/5Phos/CAGAGCNNNNNNNNCTTCGGCGCATTTTTTTTTTTTTTTTTTTTTTTTTTTTTT
E11	sc_ligation_RT_251	/5Phos/CAGAGCNNNNNNNNTTGGATCCTTTTTTTTTTTTTTTTTTTTTTTTTTTTTTTT
F11	sc_ligation_RT_263	/5Phos/CAGAGCNNNNNNNNTTCCATGGCATTTTTTTTTTTTTTTTTTTTTTTTTTTTTT
G11	sc_ligation_RT_275	/5Phos/CAGAGCNNNNNNNNGCAGACCGGTTTTTTTTTTTTTTTTTTTTTTTTTTTTTTT
H11	sc_ligation_RT_287	/5Phos/CAGAGCNNNNNNNNTATGCCGAGTTTTTTTTTTTTTTTTTTTTTTTTTTTTTTT
A12	sc_ligation_RT_204	/5Phos/CAGAGCNNNNNNNNATGGCGGATCTTTTTTTTTTTTTTTTTTTTTTTTTTTTTT
B12	sc_ligation_RT_216	/5Phos/CAGAGCNNNNNNNNGCTAACCTCATTTTTTTTTTTTTTTTTTTTTTTTTTTTTT
C12	sc_ligation_RT_228	/5Phos/CAGAGCNNNNNNNNCCAACTAACCTTTTTTTTTTTTTTTTTTTTTTTTTTTTTT
D12	sc_ligation_RT_240	/5Phos/CAGAGCNNNNNNNNCAAGGCATTCTTTTTTTTTTTTTTTTTTTTTTTTTTTTTT
E12	sc_ligation_RT_252	/5Phos/CAGAGCNNNNNNNNTTGGAATCTCTTTTTTTTTTTTTTTTTTTTTTTTTTTTTT
F12	sc_ligation_RT_264	/5Phos/CAGAGCNNNNNNNNAAGTAGTCAGTTTTTTTTTTTTTTTTTTTTTTTTTTTTTT
G12	sc_ligation_RT_276	/5Phos/CAGAGCNNNNNNNNTGAGTCCAGATTTTTTTTTTTTTTTTTTTTTTTTTTTTTT
H12	sc_ligation_RT_288	/5Phos/CAGAGCNNNNNNNNATAGTCGTAGTTTTTTTTTTTTTTTTTTTTTTTTTTTTTT

## Sheet: 3lvl_mRNA_RT_plate_4
Well Position	Name	Sequence
A1	sc_ligation_RT_289	/5Phos/CAGAGCNNNNNNNNGGATGCAGCATTTTTTTTTTTTTTTTTTTTTTTTTTTTTT
B1	sc_ligation_RT_301	/5Phos/CAGAGCNNNNNNNNATGCAATATGTTTTTTTTTTTTTTTTTTTTTTTTTTTTTT
C1	sc_ligation_RT_313	/5Phos/CAGAGCNNNNNNNNTCGTAGAGAATTTTTTTTTTTTTTTTTTTTTTTTTTTTTT
D1	sc_ligation_RT_325	/5Phos/CAGAGCNNNNNNNNCTCGATGGAGTTTTTTTTTTTTTTTTTTTTTTTTTTTTTT
E1	sc_ligation_RT_337	/5Phos/CAGAGCNNNNNNNNGAACTGCATCTTTTTTTTTTTTTTTTTTTTTTTTTTTTTT
F1	sc_ligation_RT_349	/5Phos/CAGAGCNNNNNNNNCGCCGCCTCCTTTTTTTTTTTTTTTTTTTTTTTTTTTTTT
G1	sc_ligation_RT_361	/5Phos/CAGAGCNNNNNNNNAAGCCGGCTGTTTTTTTTTTTTTTTTTTTTTTTTTTTTTT
H1	sc_ligation_RT_373	/5Phos/CAGAGCNNNNNNNNACGAGGACCTTTTTTTTTTTTTTTTTTTTTTTTTTTTTTT
A2	sc_ligation_RT_290	/5Phos/CAGAGCNNNNNNNNCCGCTATATTTTTTTTTTTTTTTTTTTTTTTTTTTTTTTT
B2	sc_ligation_RT_302	/5Phos/CAGAGCNNNNNNNNACTGCCGATATTTTTTTTTTTTTTTTTTTTTTTTTTTTTT
C2	sc_ligation_RT_314	/5Phos/CAGAGCNNNNNNNNTGATGGCCTTTTTTTTTTTTTTTTTTTTTTTTTTTTTTTT
D2	sc_ligation_RT_326	/5Phos/CAGAGCNNNNNNNNGTTGACGGCCTTTTTTTTTTTTTTTTTTTTTTTTTTTTTT
E2	sc_ligation_RT_338	/5Phos/CAGAGCNNNNNNNNACTCTCTCAATTTTTTTTTTTTTTTTTTTTTTTTTTTTTT
F2	sc_ligation_RT_350	/5Phos/CAGAGCNNNNNNNNCAAGTACTGGTTTTTTTTTTTTTTTTTTTTTTTTTTTTTT
G2	sc_ligation_RT_362	/5Phos/CAGAGCNNNNNNNNCATGCATCTCTTTTTTTTTTTTTTTTTTTTTTTTTTTTTT
H2	sc_ligation_RT_374	/5Phos/CAGAGCNNNNNNNNAACCTAGCTTTTTTTTTTTTTTTTTTTTTTTTTTTTTTTT
A3	sc_ligation_RT_291	/5Phos/CAGAGCNNNNNNNNATCGAGTCGCTTTTTTTTTTTTTTTTTTTTTTTTTTTTTT
B3	sc_ligation_RT_303	/5Phos/CAGAGCNNNNNNNNTCCAGAAGGTTTTTTTTTTTTTTTTTTTTTTTTTTTTTTT
C3	sc_ligation_RT_315	/5Phos/CAGAGCNNNNNNNNTGGAAGTACCTTTTTTTTTTTTTTTTTTTTTTTTTTTTTT
D3	sc_ligation_RT_327	/5Phos/CAGAGCNNNNNNNNCTCGTCTAGGTTTTTTTTTTTTTTTTTTTTTTTTTTTTTT
E3	sc_ligation_RT_339	/5Phos/CAGAGCNNNNNNNNGTCGCTCAGTTTTTTTTTTTTTTTTTTTTTTTTTTTTTTT
F3	sc_ligation_RT_351	/5Phos/CAGAGCNNNNNNNNCGGCGAGACCTTTTTTTTTTTTTTTTTTTTTTTTTTTTTT
G3	sc_ligation_RT_363	/5Phos/CAGAGCNNNNNNNNTCCGGTAATCTTTTTTTTTTTTTTTTTTTTTTTTTTTTTT
H3	sc_ligation_RT_375	/5Phos/CAGAGCNNNNNNNNAGTCCGCGGATTTTTTTTTTTTTTTTTTTTTTTTTTTTTT
A4	sc_ligation_RT_292	/5Phos/CAGAGCNNNNNNNNGCGACGCAGATTTTTTTTTTTTTTTTTTTTTTTTTTTTTT
B4	sc_ligation_RT_304	/5Phos/CAGAGCNNNNNNNNTTCAAGACCATTTTTTTTTTTTTTTTTTTTTTTTTTTTTT
C4	sc_ligation_RT_316	/5Phos/CAGAGCNNNNNNNNAGATATATCGTTTTTTTTTTTTTTTTTTTTTTTTTTTTTT
D4	sc_ligation_RT_328	/5Phos/CAGAGCNNNNNNNNGCTCTAACGATTTTTTTTTTTTTTTTTTTTTTTTTTTTTT
E4	sc_ligation_RT_340	/5Phos/CAGAGCNNNNNNNNCCGTCGGAGGTTTTTTTTTTTTTTTTTTTTTTTTTTTTTT
F4	sc_ligation_RT_352	/5Phos/CAGAGCNNNNNNNNGACCTCCGCCTTTTTTTTTTTTTTTTTTTTTTTTTTTTTT
G4	sc_ligation_RT_364	/5Phos/CAGAGCNNNNNNNNACCGTTACGATTTTTTTTTTTTTTTTTTTTTTTTTTTTTT
H4	sc_ligation_RT_376	/5Phos/CAGAGCNNNNNNNNACTATCCGCATTTTTTTTTTTTTTTTTTTTTTTTTTTTTT
A5	sc_ligation_RT_293	/5Phos/CAGAGCNNNNNNNNAATGGTCGACTTTTTTTTTTTTTTTTTTTTTTTTTTTTTT
B5	sc_ligation_RT_305	/5Phos/CAGAGCNNNNNNNNTATTACTCATTTTTTTTTTTTTTTTTTTTTTTTTTTTTTT
C5	sc_ligation_RT_317	/5Phos/CAGAGCNNNNNNNNCATGCTGGTTTTTTTTTTTTTTTTTTTTTTTTTTTTTTTT
D5	sc_ligation_RT_329	/5Phos/CAGAGCNNNNNNNNTGATAGAACGTTTTTTTTTTTTTTTTTTTTTTTTTTTTTT
E5	sc_ligation_RT_341	/5Phos/CAGAGCNNNNNNNNAGCGTCAATGTTTTTTTTTTTTTTTTTTTTTTTTTTTTTT
F5	sc_ligation_RT_353	/5Phos/CAGAGCNNNNNNNNTCTAGAACTATTTTTTTTTTTTTTTTTTTTTTTTTTTTTT
G5	sc_ligation_RT_365	/5Phos/CAGAGCNNNNNNNNTCCGTCGCCATTTTTTTTTTTTTTTTTTTTTTTTTTTTTT
H5	sc_ligation_RT_377	/5Phos/CAGAGCNNNNNNNNCGAGCTGCCATTTTTTTTTTTTTTTTTTTTTTTTTTTTTT
A6	sc_ligation_RT_294	/5Phos/CAGAGCNNNNNNNNTGGAACTAGATTTTTTTTTTTTTTTTTTTTTTTTTTTTTT
B6	sc_ligation_RT_306	/5Phos/CAGAGCNNNNNNNNAACTGATCTTTTTTTTTTTTTTTTTTTTTTTTTTTTTTTT
C6	sc_ligation_RT_318	/5Phos/CAGAGCNNNNNNNNGCAAGGAATATTTTTTTTTTTTTTTTTTTTTTTTTTTTTT
D6	sc_ligation_RT_330	/5Phos/CAGAGCNNNNNNNNTTAGATTCCGTTTTTTTTTTTTTTTTTTTTTTTTTTTTTT
E6	sc_ligation_RT_342	/5Phos/CAGAGCNNNNNNNNTTGAGTATCATTTTTTTTTTTTTTTTTTTTTTTTTTTTTT
F6	sc_ligation_RT_354	/5Phos/CAGAGCNNNNNNNNCGATCATTACTTTTTTTTTTTTTTTTTTTTTTTTTTTTTT
G6	sc_ligation_RT_366	/5Phos/CAGAGCNNNNNNNNGGCTATGACTTTTTTTTTTTTTTTTTTTTTTTTTTTTTTT
H6	sc_ligation_RT_378	/5Phos/CAGAGCNNNNNNNNGTCATTGCGCTTTTTTTTTTTTTTTTTTTTTTTTTTTTTT
A7	sc_ligation_RT_295	/5Phos/CAGAGCNNNNNNNNGTCCAACTCATTTTTTTTTTTTTTTTTTTTTTTTTTTTTT
B7	sc_ligation_RT_307	/5Phos/CAGAGCNNNNNNNNCCGCGGACCGTTTTTTTTTTTTTTTTTTTTTTTTTTTTTT
C7	sc_ligation_RT_319	/5Phos/CAGAGCNNNNNNNNGGCATAGCTTTTTTTTTTTTTTTTTTTTTTTTTTTTTTTT
D7	sc_ligation_RT_331	/5Phos/CAGAGCNNNNNNNNTCGATATTGATTTTTTTTTTTTTTTTTTTTTTTTTTTTTT
E7	sc_ligation_RT_343	/5Phos/CAGAGCNNNNNNNNTGAGGTAGAATTTTTTTTTTTTTTTTTTTTTTTTTTTTTT
F7	sc_ligation_RT_355	/5Phos/CAGAGCNNNNNNNNGACCTCTCTGTTTTTTTTTTTTTTTTTTTTTTTTTTTTTT
G7	sc_ligation_RT_367	/5Phos/CAGAGCNNNNNNNNACTTCCGAATTTTTTTTTTTTTTTTTTTTTTTTTTTTTTT
H7	sc_ligation_RT_379	/5Phos/CAGAGCNNNNNNNNCAAGATTAAGTTTTTTTTTTTTTTTTTTTTTTTTTTTTTT
A8	sc_ligation_RT_296	/5Phos/CAGAGCNNNNNNNNTTATAAGAACTTTTTTTTTTTTTTTTTTTTTTTTTTTTTT
B8	sc_ligation_RT_308	/5Phos/CAGAGCNNNNNNNNAATACGCAGGTTTTTTTTTTTTTTTTTTTTTTTTTTTTTT
C8	sc_ligation_RT_320	/5Phos/CAGAGCNNNNNNNNAGTAAGCATATTTTTTTTTTTTTTTTTTTTTTTTTTTTTT
D8	sc_ligation_RT_332	/5Phos/CAGAGCNNNNNNNNCCAGGTCTACTTTTTTTTTTTTTTTTTTTTTTTTTTTTTT
E8	sc_ligation_RT_344	/5Phos/CAGAGCNNNNNNNNGACTAGTCTATTTTTTTTTTTTTTTTTTTTTTTTTTTTTT
F8	sc_ligation_RT_356	/5Phos/CAGAGCNNNNNNNNGGCTAATTAATTTTTTTTTTTTTTTTTTTTTTTTTTTTTT
G8	sc_ligation_RT_368	/5Phos/CAGAGCNNNNNNNNAACTACCGACTTTTTTTTTTTTTTTTTTTTTTTTTTTTTT
H8	sc_ligation_RT_380	/5Phos/CAGAGCNNNNNNNNACGCAACTCCTTTTTTTTTTTTTTTTTTTTTTTTTTTTTT
A9	sc_ligation_RT_297	/5Phos/CAGAGCNNNNNNNNCAAGCTTCATTTTTTTTTTTTTTTTTTTTTTTTTTTTTTT
B9	sc_ligation_RT_309	/5Phos/CAGAGCNNNNNNNNGGTCGCGTCATTTTTTTTTTTTTTTTTTTTTTTTTTTTTT
C9	sc_ligation_RT_321	/5Phos/CAGAGCNNNNNNNNCGCCTCGAACTTTTTTTTTTTTTTTTTTTTTTTTTTTTTT
D9	sc_ligation_RT_333	/5Phos/CAGAGCNNNNNNNNTTGGTCATAATTTTTTTTTTTTTTTTTTTTTTTTTTTTTT
E9	sc_ligation_RT_345	/5Phos/CAGAGCNNNNNNNNCTGCTTCGACTTTTTTTTTTTTTTTTTTTTTTTTTTTTTT
F9	sc_ligation_RT_357	/5Phos/CAGAGCNNNNNNNNGATGATCGTATTTTTTTTTTTTTTTTTTTTTTTTTTTTTT
G9	sc_ligation_RT_369	/5Phos/CAGAGCNNNNNNNNCGTCCGTCCTTTTTTTTTTTTTTTTTTTTTTTTTTTTTTT
H9	sc_ligation_RT_381	/5Phos/CAGAGCNNNNNNNNTGATACGAGTTTTTTTTTTTTTTTTTTTTTTTTTTTTTTT
A10	sc_ligation_RT_298	/5Phos/CAGAGCNNNNNNNNCTGATTAAGATTTTTTTTTTTTTTTTTTTTTTTTTTTTTT
B10	sc_ligation_RT_310	/5Phos/CAGAGCNNNNNNNNAATTATCAGCTTTTTTTTTTTTTTTTTTTTTTTTTTTTTT
C10	sc_ligation_RT_322	/5Phos/CAGAGCNNNNNNNNTTAGGATCTATTTTTTTTTTTTTTTTTTTTTTTTTTTTTT
D10	sc_ligation_RT_334	/5Phos/CAGAGCNNNNNNNNAACGGACCAATTTTTTTTTTTTTTTTTTTTTTTTTTTTTT
E10	sc_ligation_RT_346	/5Phos/CAGAGCNNNNNNNNCCTAGCGCCTTTTTTTTTTTTTTTTTTTTTTTTTTTTTTT
F10	sc_ligation_RT_358	/5Phos/CAGAGCNNNNNNNNGCTCTCGCCTTTTTTTTTTTTTTTTTTTTTTTTTTTTTTT
G10	sc_ligation_RT_370	/5Phos/CAGAGCNNNNNNNNGGTCCAGGAGTTTTTTTTTTTTTTTTTTTTTTTTTTTTTT
H10	sc_ligation_RT_382	/5Phos/CAGAGCNNNNNNNNCATTATTACCTTTTTTTTTTTTTTTTTTTTTTTTTTTTTT
A11	sc_ligation_RT_299	/5Phos/CAGAGCNNNNNNNNTACTTACTTATTTTTTTTTTTTTTTTTTTTTTTTTTTTTT
B11	sc_ligation_RT_311	/5Phos/CAGAGCNNNNNNNNATTGCGCTGATTTTTTTTTTTTTTTTTTTTTTTTTTTTTT
C11	sc_ligation_RT_323	/5Phos/CAGAGCNNNNNNNNACTACTGAAGTTTTTTTTTTTTTTTTTTTTTTTTTTTTTT
D11	sc_ligation_RT_335	/5Phos/CAGAGCNNNNNNNNTTAACGTACCTTTTTTTTTTTTTTTTTTTTTTTTTTTTTT
E11	sc_ligation_RT_347	/5Phos/CAGAGCNNNNNNNNAGTTGCATCTTTTTTTTTTTTTTTTTTTTTTTTTTTTTTT
F11	sc_ligation_RT_359	/5Phos/CAGAGCNNNNNNNNACTATCTTGATTTTTTTTTTTTTTTTTTTTTTTTTTTTTT
G11	sc_ligation_RT_371	/5Phos/CAGAGCNNNNNNNNAACGAGGCTATTTTTTTTTTTTTTTTTTTTTTTTTTTTTT
H11	sc_ligation_RT_383	/5Phos/CAGAGCNNNNNNNNTCTATAAGGATTTTTTTTTTTTTTTTTTTTTTTTTTTTTT
A12	sc_ligation_RT_300	/5Phos/CAGAGCNNNNNNNNGGATCTGCAGTTTTTTTTTTTTTTTTTTTTTTTTTTTTTT
B12	sc_ligation_RT_312	/5Phos/CAGAGCNNNNNNNNAGCTAAGGTATTTTTTTTTTTTTTTTTTTTTTTTTTTTTT
C12	sc_ligation_RT_324	/5Phos/CAGAGCNNNNNNNNAATCTGGAGTTTTTTTTTTTTTTTTTTTTTTTTTTTTTTT
D12	sc_ligation_RT_336	/5Phos/CAGAGCNNNNNNNNGGACTCATTGTTTTTTTTTTTTTTTTTTTTTTTTTTTTTT
E12	sc_ligation_RT_348	/5Phos/CAGAGCNNNNNNNNAATTGCCTACTTTTTTTTTTTTTTTTTTTTTTTTTTTTTT
F12	sc_ligation_RT_360	/5Phos/CAGAGCNNNNNNNNAGGTCAATTATTTTTTTTTTTTTTTTTTTTTTTTTTTTTT
G12	sc_ligation_RT_372	/5Phos/CAGAGCNNNNNNNNACGTTCAACCTTTTTTTTTTTTTTTTTTTTTTTTTTTTTT
H12	sc_ligation_RT_384	/5Phos/CAGAGCNNNNNNNNTTGGAGTCGGTTTTTTTTTTTTTTTTTTTTTTTTTTTTTT

## Sheet: 3lvl_mRNA_Lig_plate_1
Well Position	Name	Sequence
A1	sc_ligation_1	GCTCTGACAATCAAGTTACGACGCTCTTCCGATCTACTTGATTGT
B1	sc_ligation_13	GCTCTGAGAACTAAGATACGACGCTCTTCCGATCTTCTTAGTTCT
C1	sc_ligation_25	GCTCTGAAAGTCGTTATACGACGCTCTTCCGATCTTAACGACTTT
D1	sc_ligation_37	GCTCTGAATCGAGATATACGACGCTCTTCCGATCTTATCTCGATT
E1	sc_ligation_49	GCTCTGATTAACGCCTACGACGCTCTTCCGATCTGGCGTTAAT
F1	sc_ligation_61	GCTCTGAAGCAACGTTACGACGCTCTTCCGATCTACGTTGCTT
G1	sc_ligation_73	GCTCTGATAGGTACGTACGACGCTCTTCCGATCTCGTACCTAT
H1	sc_ligation_85	GCTCTGACCATAGACTACGACGCTCTTCCGATCTGTCTATGGT
A2	sc_ligation_2	GCTCTGAAGCTGATTATACGACGCTCTTCCGATCTTAATCAGCTT
B2	sc_ligation_14	GCTCTGATTGGATAGATACGACGCTCTTCCGATCTTCTATCCAAT
C2	sc_ligation_26	GCTCTGAAGTAGCAAATACGACGCTCTTCCGATCTTTTGCTACTT
D2	sc_ligation_38	GCTCTGATTGGAGTTTTACGACGCTCTTCCGATCTAAACTCCAAT
E2	sc_ligation_50	GCTCTGAATGGTACCTACGACGCTCTTCCGATCTGGTACCATT
F2	sc_ligation_62	GCTCTGACTTACGCTTACGACGCTCTTCCGATCTAGCGTAAGT
G2	sc_ligation_74	GCTCTGATCAACGAGTACGACGCTCTTCCGATCTCTCGTTGAT
H2	sc_ligation_86	GCTCTGAGAGAACTCTACGACGCTCTTCCGATCTGAGTTCTCT
A3	sc_ligation_3	GCTCTGACCATTCTTATACGACGCTCTTCCGATCTTAAGAATGGT
B3	sc_ligation_15	GCTCTGACGATGAATTTACGACGCTCTTCCGATCTAATTCATCGT
C3	sc_ligation_27	GCTCTGATGAACCTTATACGACGCTCTTCCGATCTTAAGGTTCAT
D3	sc_ligation_39	GCTCTGAAGATCTTGATACGACGCTCTTCCGATCTTCAAGATCTT
E3	sc_ligation_51	GCTCTGACTGGTCAATACGACGCTCTTCCGATCTTTGACCAGT
F3	sc_ligation_63	GCTCTGAACCTTGCATACGACGCTCTTCCGATCTTGCAAGGTT
G3	sc_ligation_75	GCTCTGACGTTGATGTACGACGCTCTTCCGATCTCATCAACGT
H3	sc_ligation_87	GCTCTGACGCAAGTATACGACGCTCTTCCGATCTTACTTGCGT
A4	sc_ligation_4	GCTCTGAATAGGTTGTTACGACGCTCTTCCGATCTACAACCTATT
B4	sc_ligation_16	GCTCTGAAGTCATCTATACGACGCTCTTCCGATCTTAGATGACTT
C4	sc_ligation_28	GCTCTGAGCTAATACTTACGACGCTCTTCCGATCTAGTATTAGCT
D4	sc_ligation_40	GCTCTGAGGAAGTTATTACGACGCTCTTCCGATCTATAACTTCCT
E4	sc_ligation_52	GCTCTGACTCATTCGTACGACGCTCTTCCGATCTCGAATGAGT
F4	sc_ligation_64	GCTCTGAAGTCGAAGTACGACGCTCTTCCGATCTCTTCGACTT
G4	sc_ligation_76	GCTCTGAACTTGCTGTACGACGCTCTTCCGATCTCAGCAAGTT
H4	sc_ligation_88	GCTCTGAGACGTATCTACGACGCTCTTCCGATCTGATACGTCT
A5	sc_ligation_5	GCTCTGATCTAGGAATTACGACGCTCTTCCGATCTATTCCTAGAT
B5	sc_ligation_17	GCTCTGAGAGGAATTTTACGACGCTCTTCCGATCTAAATTCCTCT
C5	sc_ligation_29	GCTCTGAAATACCTGTTACGACGCTCTTCCGATCTACAGGTATTT
D5	sc_ligation_41	GCTCTGACATATCCTTTACGACGCTCTTCCGATCTAAGGATATGT
E5	sc_ligation_53	GCTCTGAGTTGCTTGTACGACGCTCTTCCGATCTCAAGCAACT
F5	sc_ligation_65	GCTCTGAGCGGATAATACGACGCTCTTCCGATCTTTATCCGCT
G5	sc_ligation_77	GCTCTGACTTCTCGATACGACGCTCTTCCGATCTTCGAGAAGT
H5	sc_ligation_89	GCTCTGATCCGATCTTACGACGCTCTTCCGATCTAGATCGGAT
A6	sc_ligation_6	GCTCTGAAGGAATCAATACGACGCTCTTCCGATCTTTGATTCCTT
B6	sc_ligation_18	GCTCTGAGTACCTAATTACGACGCTCTTCCGATCTATTAGGTACT
C6	sc_ligation_30	GCTCTGAAAGATGGAATACGACGCTCTTCCGATCTTTCCATCTTT
D6	sc_ligation_42	GCTCTGACTTAGGTAATACGACGCTCTTCCGATCTTTACCTAAGT
E6	sc_ligation_54	GCTCTGAGGAACGAATACGACGCTCTTCCGATCTTTCGTTCCT
F6	sc_ligation_66	GCTCTGAGGTACTCTTACGACGCTCTTCCGATCTAGAGTACCT
G6	sc_ligation_78	GCTCTGAATCCTTGGTACGACGCTCTTCCGATCTCCAAGGATT
H6	sc_ligation_90	GCTCTGAGAAGCTGATACGACGCTCTTCCGATCTTCAGCTTCT
A7	sc_ligation_7	GCTCTGAGTAATCCTTTACGACGCTCTTCCGATCTAAGGATTACT
B7	sc_ligation_19	GCTCTGAATTCAACCATACGACGCTCTTCCGATCTTGGTTGAATT
C7	sc_ligation_31	GCTCTGAACGATCAATTACGACGCTCTTCCGATCTATTGATCGTT
D7	sc_ligation_43	GCTCTGAGTAGGATATTACGACGCTCTTCCGATCTATATCCTACT
E7	sc_ligation_55	GCTCTGAAGCTCCAATACGACGCTCTTCCGATCTTTGGAGCTT
F7	sc_ligation_67	GCTCTGAATGCTCAGTACGACGCTCTTCCGATCTCTGAGCATT
G7	sc_ligation_79	GCTCTGATCGTCCTTTACGACGCTCTTCCGATCTAAGGACGAT
H7	sc_ligation_91	GCTCTGATCCTTCGATACGACGCTCTTCCGATCTTCGAAGGAT
A8	sc_ligation_8	GCTCTGACTTATAGGATACGACGCTCTTCCGATCTTCCTATAAGT
B8	sc_ligation_20	GCTCTGACAACTAGTTTACGACGCTCTTCCGATCTAACTAGTTGT
C8	sc_ligation_32	GCTCTGATCAGATTCATACGACGCTCTTCCGATCTTGAATCTGAT
D8	sc_ligation_44	GCTCTGACAGACTAATTACGACGCTCTTCCGATCTATTAGTCTGT
E8	sc_ligation_56	GCTCTGACCTTCCTATACGACGCTCTTCCGATCTTAGGAAGGT
F8	sc_ligation_68	GCTCTGACTAAGAGCTACGACGCTCTTCCGATCTGCTCTTAGT
G8	sc_ligation_80	GCTCTGATGCCAGTTTACGACGCTCTTCCGATCTAACTGGCAT
H8	sc_ligation_92	GCTCTGAAACTGACCTACGACGCTCTTCCGATCTGGTCAGTTT
A9	sc_ligation_9	GCTCTGACCTCTTATATACGACGCTCTTCCGATCTTATAAGAGGT
B9	sc_ligation_21	GCTCTGAAACGAAGAATACGACGCTCTTCCGATCTTTCTTCGTTT
C9	sc_ligation_33	GCTCTGATTGGTTCTATACGACGCTCTTCCGATCTTAGAACCAAT
D9	sc_ligation_45	GCTCTGAATAAGGACATACGACGCTCTTCCGATCTTGTCCTTATT
E9	sc_ligation_57	GCTCTGAGGATACTGTACGACGCTCTTCCGATCTCAGTATCCT
F9	sc_ligation_69	GCTCTGAATCCAGCATACGACGCTCTTCCGATCTTGCTGGATT
G9	sc_ligation_81	GCTCTGACGCTTATCTACGACGCTCTTCCGATCTGATAAGCGT
H9	sc_ligation_93	GCTCTGATCGCATCATACGACGCTCTTCCGATCTTGATGCGAT
A10	sc_ligation_10	GCTCTGAAGGAGAATATACGACGCTCTTCCGATCTTATTCTCCTT
B10	sc_ligation_22	GCTCTGACAAGAACTTTACGACGCTCTTCCGATCTAAGTTCTTGT
C10	sc_ligation_34	GCTCTGACAATGAGAATACGACGCTCTTCCGATCTTTCTCATTGT
D10	sc_ligation_46	GCTCTGATTGAGTCAATACGACGCTCTTCCGATCTTTGACTCAAT
E10	sc_ligation_58	GCTCTGACCATTAGGTACGACGCTCTTCCGATCTCCTAATGGT
F10	sc_ligation_70	GCTCTGATCAAGCGTTACGACGCTCTTCCGATCTACGCTTGAT
G10	sc_ligation_82	GCTCTGAAAGTACGCTACGACGCTCTTCCGATCTGCGTACTTT
H10	sc_ligation_94	GCTCTGACCTATCAGTACGACGCTCTTCCGATCTCTGATAGGT
A11	sc_ligation_11	GCTCTGACTGGTATTATACGACGCTCTTCCGATCTTAATACCAGT
B11	sc_ligation_23	GCTCTGATGAGTAAGTTACGACGCTCTTCCGATCTACTTACTCAT
C11	sc_ligation_35	GCTCTGAGATCCATATTACGACGCTCTTCCGATCTATATGGATCT
D11	sc_ligation_47	GCTCTGAAACTGGTATTACGACGCTCTTCCGATCTATACCAGTTT
E11	sc_ligation_59	GCTCTGAAGTTCCTCTACGACGCTCTTCCGATCTGAGGAACTT
F11	sc_ligation_71	GCTCTGACAATGCTGTACGACGCTCTTCCGATCTCAGCATTGT
G11	sc_ligation_83	GCTCTGATCTTAGCCTACGACGCTCTTCCGATCTGGCTAAGAT
H11	sc_ligation_95	GCTCTGAGTAGAGACTACGACGCTCTTCCGATCTGTCTCTACT
A12	sc_ligation_12	GCTCTGATAGAATCCATACGACGCTCTTCCGATCTTGGATTCTAT
B12	sc_ligation_24	GCTCTGAAATCATGGTTACGACGCTCTTCCGATCTACCATGATTT
C12	sc_ligation_36	GCTCTGAATGACTGATTACGACGCTCTTCCGATCTATCAGTCATT
D12	sc_ligation_48	GCTCTGAAAGTTAGGATACGACGCTCTTCCGATCTTCCTAACTTT
E12	sc_ligation_60	GCTCTGAATGCGACTTACGACGCTCTTCCGATCTAGTCGCATT
F12	sc_ligation_72	GCTCTGACCAACCATTACGACGCTCTTCCGATCTATGGTTGGT
G12	sc_ligation_84	GCTCTGATAAGGCAGTACGACGCTCTTCCGATCTCTGCCTTAT
H12	sc_ligation_96	GCTCTGAGTTACGACTACGACGCTCTTCCGATCTGTCGTAACT

## Sheet: 3lvl_mRNA_Lig_plate_2
Well Position	Name	Sequence
A1	sc_ligation_97	GCTCTGACTATGGTTTTACGACGCTCTTCCGATCTAAACCATAGT
B1	sc_ligation_109	GCTCTGAGTAGCCTTTACGACGCTCTTCCGATCTAAGGCTACT
C1	sc_ligation_121	GCTCTGATGATATCGTTACGACGCTCTTCCGATCTACGATATCAT
D1	sc_ligation_133	GCTCTGACATGCTCTTACGACGCTCTTCCGATCTAGAGCATGT
E1	sc_ligation_145	GCTCTGATTCGCTTATTACGACGCTCTTCCGATCTATAAGCGAAT
F1	sc_ligation_157	GCTCTGAAGTTACCATTACGACGCTCTTCCGATCTATGGTAACTT
G1	sc_ligation_169	GCTCTGATGGATTGGTACGACGCTCTTCCGATCTCCAATCCAT
H1	sc_ligation_181	GCTCTGAAAGCAGCGTACGACGCTCTTCCGATCTCGCTGCTTT
A2	sc_ligation_98	GCTCTGAGTTCAGTTTTACGACGCTCTTCCGATCTAAACTGAACT
B2	sc_ligation_110	GCTCTGAAACGTACTTTACGACGCTCTTCCGATCTAAGTACGTTT
C2	sc_ligation_122	GCTCTGATATAAGCGTTACGACGCTCTTCCGATCTACGCTTATAT
D2	sc_ligation_134	GCTCTGACGACCTCTTACGACGCTCTTCCGATCTAGAGGTCGT
E2	sc_ligation_146	GCTCTGACAGGATTATTACGACGCTCTTCCGATCTATAATCCTGT
F2	sc_ligation_158	GCTCTGAGGCATTAATTACGACGCTCTTCCGATCTATTAATGCCT
G2	sc_ligation_170	GCTCTGAAAGGCTGGTACGACGCTCTTCCGATCTCCAGCCTTT
H2	sc_ligation_182	GCTCTGAAGGTTCCGTACGACGCTCTTCCGATCTCGGAACCTT
A3	sc_ligation_99	GCTCTGAATCAGCTTTTACGACGCTCTTCCGATCTAAAGCTGATT
B3	sc_ligation_111	GCTCTGACCAATACTTTACGACGCTCTTCCGATCTAAGTATTGGT
C3	sc_ligation_123	GCTCTGACGTTCCGTTACGACGCTCTTCCGATCTACGGAACGT
D3	sc_ligation_135	GCTCTGAGTTGAATCTTACGACGCTCTTCCGATCTAGATTCAACT
E3	sc_ligation_147	GCTCTGAGAGTAGTATTACGACGCTCTTCCGATCTATACTACTCT
F3	sc_ligation_159	GCTCTGAGATGGTAATTACGACGCTCTTCCGATCTATTACCATCT
G3	sc_ligation_171	GCTCTGAGACGATGGTACGACGCTCTTCCGATCTCCATCGTCT
H3	sc_ligation_183	GCTCTGACCTTACCGTACGACGCTCTTCCGATCTCGGTAAGGT
A4	sc_ligation_100	GCTCTGAGAACGATTTTACGACGCTCTTCCGATCTAAATCGTTCT
B4	sc_ligation_112	GCTCTGATTCGGTATTTACGACGCTCTTCCGATCTAATACCGAAT
C4	sc_ligation_124	GCTCTGACTAGACGTTACGACGCTCTTCCGATCTACGTCTAGT
D4	sc_ligation_136	GCTCTGAAACCAATCTTACGACGCTCTTCCGATCTAGATTGGTTT
E4	sc_ligation_148	GCTCTGAGTCAACTATTACGACGCTCTTCCGATCTATAGTTGACT
F4	sc_ligation_160	GCTCTGATGCTTGAATTACGACGCTCTTCCGATCTATTCAAGCAT
G4	sc_ligation_172	GCTCTGATTGGTCGGTACGACGCTCTTCCGATCTCCGACCAAT
H4	sc_ligation_184	GCTCTGAAGCCTACGTACGACGCTCTTCCGATCTCGTAGGCTT
A5	sc_ligation_101	GCTCTGAAATGAGGTTTACGACGCTCTTCCGATCTAACCTCATTT
B5	sc_ligation_113	GCTCTGATACTGGATTTACGACGCTCTTCCGATCTAATCCAGTAT
C5	sc_ligation_125	GCTCTGAGTATTCAGTTACGACGCTCTTCCGATCTACTGAATACT
D5	sc_ligation_137	GCTCTGAAGTTATGCTTACGACGCTCTTCCGATCTAGCATAACTT
E5	sc_ligation_149	GCTCTGATCCAGATATTACGACGCTCTTCCGATCTATATCTGGAT
F5	sc_ligation_161	GCTCTGAATTGCGAATTACGACGCTCTTCCGATCTATTCGCAATT
G5	sc_ligation_173	GCTCTGAATCGACGGTACGACGCTCTTCCGATCTCCGTCGATT
H5	sc_ligation_185	GCTCTGAGGAAGACGTACGACGCTCTTCCGATCTCGTCTTCCT
A6	sc_ligation_102	GCTCTGACGCTCGTTTACGACGCTCTTCCGATCTAACGAGCGT
B6	sc_ligation_114	GCTCTGACCTAGAATTTACGACGCTCTTCCGATCTAATTCTAGGT
C6	sc_ligation_126	GCTCTGAGGTCCAGTTACGACGCTCTTCCGATCTACTGGACCT
D6	sc_ligation_138	GCTCTGACATAATGCTTACGACGCTCTTCCGATCTAGCATTATGT
E6	sc_ligation_150	GCTCTGAATGGCATATTACGACGCTCTTCCGATCTATATGCCATT
F6	sc_ligation_162	GCTCTGACTCCGAATTACGACGCTCTTCCGATCTATTCGGAGT
G6	sc_ligation_174	GCTCTGAACTGCAGGTACGACGCTCTTCCGATCTCCTGCAGTT
H6	sc_ligation_186	GCTCTGAGATCAACGTACGACGCTCTTCCGATCTCGTTGATCT
A7	sc_ligation_103	GCTCTGAATGATCGTTTACGACGCTCTTCCGATCTAACGATCATT
B7	sc_ligation_115	GCTCTGATAGCATTGTTACGACGCTCTTCCGATCTACAATGCTAT
C7	sc_ligation_127	GCTCTGAATAACCAGTTACGACGCTCTTCCGATCTACTGGTTATT
D7	sc_ligation_139	GCTCTGACGATAGCTTACGACGCTCTTCCGATCTAGCTATCGT
E7	sc_ligation_151	GCTCTGACGTATTGATTACGACGCTCTTCCGATCTATCAATACGT
F7	sc_ligation_163	GCTCTGATTCCTCAATTACGACGCTCTTCCGATCTATTGAGGAAT
G7	sc_ligation_175	GCTCTGAGTAGCAGGTACGACGCTCTTCCGATCTCCTGCTACT
H7	sc_ligation_187	GCTCTGAGTCGTTAGTACGACGCTCTTCCGATCTCTAACGACT
A8	sc_ligation_104	GCTCTGAGACGCGTTTACGACGCTCTTCCGATCTAACGCGTCT
B8	sc_ligation_116	GCTCTGATTACCATGTTACGACGCTCTTCCGATCTACATGGTAAT
C8	sc_ligation_128	GCTCTGAACCATAAGTTACGACGCTCTTCCGATCTACTTATGGTT
D8	sc_ligation_140	GCTCTGAGATTATCCTTACGACGCTCTTCCGATCTAGGATAATCT
E8	sc_ligation_152	GCTCTGATCATCAGATTACGACGCTCTTCCGATCTATCTGATGAT
F8	sc_ligation_164	GCTCTGAGAGAGTTGTACGACGCTCTTCCGATCTCAACTCTCT
G8	sc_ligation_176	GCTCTGAGGTCTTCGTACGACGCTCTTCCGATCTCGAAGACCT
H8	sc_ligation_188	GCTCTGACCAGGTAGTACGACGCTCTTCCGATCTCTACCTGGT
A9	sc_ligation_105	GCTCTGAGATTACGTTTACGACGCTCTTCCGATCTAACGTAATCT
B9	sc_ligation_117	GCTCTGATACGAATGTTACGACGCTCTTCCGATCTACATTCGTAT
C9	sc_ligation_129	GCTCTGAACGGAAGTTACGACGCTCTTCCGATCTACTTCCGTT
D9	sc_ligation_141	GCTCTGATTCCGCCTTACGACGCTCTTCCGATCTAGGCGGAAT
E9	sc_ligation_153	GCTCTGATCTGAAGATTACGACGCTCTTCCGATCTATCTTCAGAT
F9	sc_ligation_165	GCTCTGAACGCCTTGTACGACGCTCTTCCGATCTCAAGGCGTT
G9	sc_ligation_177	GCTCTGATTGCCTCGTACGACGCTCTTCCGATCTCGAGGCAAT
H9	sc_ligation_189	GCTCTGATGATGGAGTACGACGCTCTTCCGATCTCTCCATCAT
A10	sc_ligation_106	GCTCTGAATCCAAGTTTACGACGCTCTTCCGATCTAACTTGGATT
B10	sc_ligation_118	GCTCTGAGAACCGGTTACGACGCTCTTCCGATCTACCGGTTCT
C10	sc_ligation_130	GCTCTGAGGAGTTCTTACGACGCTCTTCCGATCTAGAACTCCT
D10	sc_ligation_142	GCTCTGAACGAGCCTTACGACGCTCTTCCGATCTAGGCTCGTT
E10	sc_ligation_154	GCTCTGATGAATGCATTACGACGCTCTTCCGATCTATGCATTCAT
F10	sc_ligation_166	GCTCTGACTGATCTGTACGACGCTCTTCCGATCTCAGATCAGT
G10	sc_ligation_178	GCTCTGAGCGAATCGTACGACGCTCTTCCGATCTCGATTCGCT
H10	sc_ligation_190	GCTCTGACATGCGAGTACGACGCTCTTCCGATCTCTCGCATGT
A11	sc_ligation_107	GCTCTGATAAGGTCTTTACGACGCTCTTCCGATCTAAGACCTTAT
B11	sc_ligation_119	GCTCTGATATTGAGGTTACGACGCTCTTCCGATCTACCTCAATAT
C11	sc_ligation_131	GCTCTGACTTACTTCTTACGACGCTCTTCCGATCTAGAAGTAAGT
D11	sc_ligation_143	GCTCTGATGGCTACTTACGACGCTCTTCCGATCTAGTAGCCAT
E11	sc_ligation_155	GCTCTGAGGAAGCATTACGACGCTCTTCCGATCTATGCTTCCT
F11	sc_ligation_167	GCTCTGAGAGTCCTGTACGACGCTCTTCCGATCTCAGGACTCT
G11	sc_ligation_179	GCTCTGAGAATGGCGTACGACGCTCTTCCGATCTCGCCATTCT
H11	sc_ligation_191	GCTCTGAGCTCAGAGTACGACGCTCTTCCGATCTCTCTGAGCT
A12	sc_ligation_108	GCTCTGAATACTGCTTTACGACGCTCTTCCGATCTAAGCAGTATT
B12	sc_ligation_120	GCTCTGATGCGTCGTTACGACGCTCTTCCGATCTACGACGCAT
C12	sc_ligation_132	GCTCTGATTCATCTCTTACGACGCTCTTCCGATCTAGAGATGAAT
D12	sc_ligation_144	GCTCTGATGGTTAACTTACGACGCTCTTCCGATCTAGTTAACCAT
E12	sc_ligation_156	GCTCTGAATAGTCCATTACGACGCTCTTCCGATCTATGGACTATT
F12	sc_ligation_168	GCTCTGAGCGGTATGTACGACGCTCTTCCGATCTCATACCGCT
G12	sc_ligation_180	GCTCTGAGGTTAGCGTACGACGCTCTTCCGATCTCGCTAACCT
H12	sc_ligation_192	GCTCTGAAACGTCAGTACGACGCTCTTCCGATCTCTGACGTTT

## Sheet: 3lvl_mRNA_Lig_plate_3
Well Position	Name	Sequence	since ligation plate 3 indexes are all the same length, it is not recommended to use them on their own, only with other ligation plates. It'll throw off the base balance in the sequencing.
A1	sc_ligation_193	GCTCTGACCGCTAAGTACGACGCTCTTCCGATCTCTTAGCGGT
B1	sc_ligation_205	GCTCTGACCAGAAGCTACGACGCTCTTCCGATCTGCTTCTGGT
C1	sc_ligation_217	GCTCTGACAGCGAACTACGACGCTCTTCCGATCTGTTCGCTGT
D1	sc_ligation_229	GCTCTGACGCTACGATACGACGCTCTTCCGATCTTCGTAGCGT
E1	sc_ligation_241	GCTCTGACGTCGGAATACGACGCTCTTCCGATCTTTCCGACGT
F1	sc_ligation_253	GCTCTGAAACCTCGTTACGACGCTCTTCCGATCTACGAGGTTT
G1	sc_ligation_265	GCTCTGACTGCGTTGTACGACGCTCTTCCGATCTCAACGCAGT
H1	sc_ligation_277	GCTCTGATATCGTCGTACGACGCTCTTCCGATCTCGACGATAT
A2	sc_ligation_194	GCTCTGAATTCGGTCTACGACGCTCTTCCGATCTGACCGAATT
B2	sc_ligation_206	GCTCTGAACCTATCCTACGACGCTCTTCCGATCTGGATAGGTT
C2	sc_ligation_218	GCTCTGAGGAGCAACTACGACGCTCTTCCGATCTGTTGCTCCT
D2	sc_ligation_230	GCTCTGATTCGGAGATACGACGCTCTTCCGATCTTCTCCGAAT
E2	sc_ligation_242	GCTCTGACGAGAGAATACGACGCTCTTCCGATCTTTCTCTCGT
F2	sc_ligation_254	GCTCTGATATGGCGTTACGACGCTCTTCCGATCTACGCCATAT
G2	sc_ligation_266	GCTCTGAACCGATTGTACGACGCTCTTCCGATCTCAATCGGTT
H2	sc_ligation_278	GCTCTGAGCATCTCGTACGACGCTCTTCCGATCTCGAGATGCT
A3	sc_ligation_195	GCTCTGATGGTAGTCTACGACGCTCTTCCGATCTGACTACCAT
B3	sc_ligation_207	GCTCTGATAGTCGCCTACGACGCTCTTCCGATCTGGCGACTAT
C3	sc_ligation_219	GCTCTGACGGTCTTATACGACGCTCTTCCGATCTTAAGACCGT
D3	sc_ligation_231	GCTCTGATGGAGAGATACGACGCTCTTCCGATCTTCTCTCCAT
E3	sc_ligation_243	GCTCTGAGGCCAGAATACGACGCTCTTCCGATCTTTCTGGCCT
F3	sc_ligation_255	GCTCTGAATTGCCGTTACGACGCTCTTCCGATCTACGGCAATT
G3	sc_ligation_267	GCTCTGAGCCTTCTGTACGACGCTCTTCCGATCTCAGAAGGCT
H3	sc_ligation_279	GCTCTGATTACGGCGTACGACGCTCTTCCGATCTCGCCGTAAT
A4	sc_ligation_196	GCTCTGAAGCGAGTCTACGACGCTCTTCCGATCTGACTCGCTT
B4	sc_ligation_208	GCTCTGAAATGCGCCTACGACGCTCTTCCGATCTGGCGCATTT
C4	sc_ligation_220	GCTCTGACCGAGCTATACGACGCTCTTCCGATCTTAGCTCGGT
D4	sc_ligation_232	GCTCTGACGCGTTCATACGACGCTCTTCCGATCTTGAACGCGT
E4	sc_ligation_244	GCTCTGAGGACTCAATACGACGCTCTTCCGATCTTTGAGTCCT
F4	sc_ligation_256	GCTCTGATCGTTGCTTACGACGCTCTTCCGATCTAGCAACGAT
G4	sc_ligation_268	GCTCTGAGTCCGATGTACGACGCTCTTCCGATCTCATCGGACT
H4	sc_ligation_280	GCTCTGATGGAACCGTACGACGCTCTTCCGATCTCGGTTCCAT
A5	sc_ligation_197	GCTCTGACGTCAGTCTACGACGCTCTTCCGATCTGACTGACGT
B5	sc_ligation_209	GCTCTGATCCGTACCTACGACGCTCTTCCGATCTGGTACGGAT
C5	sc_ligation_221	GCTCTGACCTGGATATACGACGCTCTTCCGATCTTATCCAGGT
D5	sc_ligation_233	GCTCTGACCAAGGCATACGACGCTCTTCCGATCTTGCCTTGGT
E5	sc_ligation_245	GCTCTGAGACCGCAATACGACGCTCTTCCGATCTTTGCGGTCT
F5	sc_ligation_257	GCTCTGATGATGCCTTACGACGCTCTTCCGATCTAGGCATCAT
G5	sc_ligation_269	GCTCTGAGGTTCTGGTACGACGCTCTTCCGATCTCCAGAACCT
H5	sc_ligation_281	GCTCTGACTTCGACGTACGACGCTCTTCCGATCTCGTCGAAGT
A6	sc_ligation_198	GCTCTGATACCGCTCTACGACGCTCTTCCGATCTGAGCGGTAT
B6	sc_ligation_210	GCTCTGAGGACTACCTACGACGCTCTTCCGATCTGGTAGTCCT
C6	sc_ligation_222	GCTCTGAACCGCTGATACGACGCTCTTCCGATCTTCAGCGGTT
D6	sc_ligation_234	GCTCTGAACTACGCATACGACGCTCTTCCGATCTTGCGTAGTT
E6	sc_ligation_246	GCTCTGAGTCGCCAATACGACGCTCTTCCGATCTTTGGCGACT
F6	sc_ligation_258	GCTCTGAGCGCAACTTACGACGCTCTTCCGATCTAGTTGCGCT
G6	sc_ligation_270	GCTCTGACCTGATGGTACGACGCTCTTCCGATCTCCATCAGGT
H6	sc_ligation_282	GCTCTGATGCCGTAGTACGACGCTCTTCCGATCTCTACGGCAT
A7	sc_ligation_199	GCTCTGACCGTAATCTACGACGCTCTTCCGATCTGATTACGGT
B7	sc_ligation_211	GCTCTGAGAAGGACCTACGACGCTCTTCCGATCTGGTCCTTCT
C7	sc_ligation_223	GCTCTGACCAACTGATACGACGCTCTTCCGATCTTCAGTTGGT
D7	sc_ligation_235	GCTCTGATAGGAGCATACGACGCTCTTCCGATCTTGCTCCTAT
E7	sc_ligation_247	GCTCTGACAGCGGTTTACGACGCTCTTCCGATCTAACCGCTGT
F7	sc_ligation_259	GCTCTGAGCGACTATTACGACGCTCTTCCGATCTATAGTCGCT
G7	sc_ligation_271	GCTCTGACGCAATGGTACGACGCTCTTCCGATCTCCATTGCGT
H7	sc_ligation_283	GCTCTGACGTACTAGTACGACGCTCTTCCGATCTCTAGTACGT
A8	sc_ligation_200	GCTCTGAAACGTTGCTACGACGCTCTTCCGATCTGCAACGTTT
B8	sc_ligation_212	GCTCTGAAGAGGTACTACGACGCTCTTCCGATCTGTACCTCTT
C8	sc_ligation_224	GCTCTGATGACCGGATACGACGCTCTTCCGATCTTCCGGTCAT
D8	sc_ligation_236	GCTCTGAGAGGTCCATACGACGCTCTTCCGATCTTGGACCTCT
E8	sc_ligation_248	GCTCTGAGGCATCTTTACGACGCTCTTCCGATCTAAGATGCCT
F8	sc_ligation_260	GCTCTGACTTGGCATTACGACGCTCTTCCGATCTATGCCAAGT
G8	sc_ligation_272	GCTCTGATCTCTCGGTACGACGCTCTTCCGATCTCCGAGAGAT
H8	sc_ligation_284	GCTCTGAGGAGATAGTACGACGCTCTTCCGATCTCTATCTCCT
A9	sc_ligation_201	GCTCTGATTGAGCGCTACGACGCTCTTCCGATCTGCGCTCAAT
B9	sc_ligation_213	GCTCTGAATCGCTACTACGACGCTCTTCCGATCTGTAGCGATT
C9	sc_ligation_225	GCTCTGACATACGGATACGACGCTCTTCCGATCTTCCGTATGT
D9	sc_ligation_237	GCTCTGATCAGGCCATACGACGCTCTTCCGATCTTGGCCTGAT
E9	sc_ligation_249	GCTCTGATGGCGCTTTACGACGCTCTTCCGATCTAAGCGCCAT
F9	sc_ligation_261	GCTCTGACTCTCCATTACGACGCTCTTCCGATCTATGGAGAGT
G9	sc_ligation_273	GCTCTGAAACTCCGGTACGACGCTCTTCCGATCTCCGGAGTTT
H9	sc_ligation_285	GCTCTGACTCTGGAGTACGACGCTCTTCCGATCTCTCCAGAGT
A10	sc_ligation_202	GCTCTGATTCTCCGCTACGACGCTCTTCCGATCTGCGGAGAAT
B10	sc_ligation_214	GCTCTGAACTCCGACTACGACGCTCTTCCGATCTGTCGGAGTT
C10	sc_ligation_226	GCTCTGAAGGTAGGATACGACGCTCTTCCGATCTTCCTACCTT
D10	sc_ligation_238	GCTCTGAGCCTACCATACGACGCTCTTCCGATCTTGGTAGGCT
E10	sc_ligation_250	GCTCTGAGCATTGGTTACGACGCTCTTCCGATCTACCAATGCT
F10	sc_ligation_262	GCTCTGAGCTGCCATTACGACGCTCTTCCGATCTATGGCAGCT
G10	sc_ligation_274	GCTCTGACTATCCGGTACGACGCTCTTCCGATCTCCGGATAGT
H10	sc_ligation_286	GCTCTGAAACCGGAGTACGACGCTCTTCCGATCTCTCCGGTTT
A11	sc_ligation_203	GCTCTGATACGACGCTACGACGCTCTTCCGATCTGCGTCGTAT
B11	sc_ligation_215	GCTCTGATTGCCGACTACGACGCTCTTCCGATCTGTCGGCAAT
C11	sc_ligation_227	GCTCTGAATGCGCGATACGACGCTCTTCCGATCTTCGCGCATT
D11	sc_ligation_239	GCTCTGATTCGACCATACGACGCTCTTCCGATCTTGGTCGAAT
E11	sc_ligation_251	GCTCTGAGCTACGGTTACGACGCTCTTCCGATCTACCGTAGCT
F11	sc_ligation_263	GCTCTGATACGCCATTACGACGCTCTTCCGATCTATGGCGTAT
G11	sc_ligation_275	GCTCTGATGAGACGGTACGACGCTCTTCCGATCTCCGTCTCAT
H11	sc_ligation_287	GCTCTGAACGAGGAGTACGACGCTCTTCCGATCTCTCCTCGTT
A12	sc_ligation_204	GCTCTGATCTCGAGCTACGACGCTCTTCCGATCTGCTCGAGAT
B12	sc_ligation_216	GCTCTGAGCTGGAACTACGACGCTCTTCCGATCTGTTCCAGCT
C12	sc_ligation_228	GCTCTGAGGTACCGATACGACGCTCTTCCGATCTTCGGTACCT
D12	sc_ligation_240	GCTCTGAGGAGACCATACGACGCTCTTCCGATCTTGGTCTCCT
E12	sc_ligation_252	GCTCTGACCGAAGGTTACGACGCTCTTCCGATCTACCTTCGGT
F12	sc_ligation_264	GCTCTGACCGGCAATTACGACGCTCTTCCGATCTATTGCCGGT
G12	sc_ligation_276	GCTCTGATCAGGAGGTACGACGCTCTTCCGATCTCCTCCTGAT
H12	sc_ligation_288	GCTCTGACAGTAGAGTACGACGCTCTTCCGATCTCTCTACTGT

## Sheet: 3lvl_mRNA_Lig_plate_4
Well Position	Name	Sequence
A1	sc_ligation_289	GCTCTGATTCAGCAGTACGACGCTCTTCCGATCTCTGCTGAAT
B1	sc_ligation_301	GCTCTGAGCGATTGCTACGACGCTCTTCCGATCTGCAATCGCT
C1	sc_ligation_313	GCTCTGACGTAGACCTACGACGCTCTTCCGATCTGGTCTACGT
D1	sc_ligation_325	GCTCTGAATAGGAGTATACGACGCTCTTCCGATCTTACTCCTATT
E1	sc_ligation_337	GCTCTGAAATCGCATATACGACGCTCTTCCGATCTTATGCGATTT
F1	sc_ligation_349	GCTCTGACTCGAGGATACGACGCTCTTCCGATCTTCCTCGAGT
G1	sc_ligation_361	GCTCTGATCTAACTCATACGACGCTCTTCCGATCTTGAGTTAGAT
H1	sc_ligation_373	GCTCTGATTATGCGAATACGACGCTCTTCCGATCTTTCGCATAAT
A2	sc_ligation_290	GCTCTGATCTTCCAGTACGACGCTCTTCCGATCTCTGGAAGAT
B2	sc_ligation_302	GCTCTGAGTATCTGCTACGACGCTCTTCCGATCTGCAGATACT
C2	sc_ligation_314	GCTCTGACTCGAACCTACGACGCTCTTCCGATCTGGTTCGAGT
D2	sc_ligation_326	GCTCTGATACTCTCTATACGACGCTCTTCCGATCTTAGAGAGTAT
E2	sc_ligation_338	GCTCTGAAAGACCATATACGACGCTCTTCCGATCTTATGGTCTTT
F2	sc_ligation_350	GCTCTGAAAGATTCGATACGACGCTCTTCCGATCTTCGAATCTTT
G2	sc_ligation_362	GCTCTGAAGAAGATCATACGACGCTCTTCCGATCTTGATCTTCTT
H2	sc_ligation_374	GCTCTGATCCGCGAATACGACGCTCTTCCGATCTTTCGCGGAT
A3	sc_ligation_291	GCTCTGAGCATGAAGTACGACGCTCTTCCGATCTCTTCATGCT
B3	sc_ligation_303	GCTCTGACTGGATGCTACGACGCTCTTCCGATCTGCATCCAGT
C3	sc_ligation_315	GCTCTGATGCCAACCTACGACGCTCTTCCGATCTGGTTGGCAT
D3	sc_ligation_327	GCTCTGAAGGCTCTATACGACGCTCTTCCGATCTTAGAGCCTT
E3	sc_ligation_339	GCTCTGAGCCGAATATACGACGCTCTTCCGATCTTATTCGGCT
F3	sc_ligation_351	GCTCTGAGTTGGCGATACGACGCTCTTCCGATCTTCGCCAACT
G3	sc_ligation_363	GCTCTGATAATAGGCATACGACGCTCTTCCGATCTTGCCTATTAT
H3	sc_ligation_375	GCTCTGAAGCTTAGAATACGACGCTCTTCCGATCTTTCTAAGCTT
A4	sc_ligation_292	GCTCTGACATCGTTCTACGACGCTCTTCCGATCTGAACGATGT
B4	sc_ligation_304	GCTCTGAACCATGGCTACGACGCTCTTCCGATCTGCCATGGTT
C4	sc_ligation_316	GCTCTGAGAGCTTACTACGACGCTCTTCCGATCTGTAAGCTCT
D4	sc_ligation_328	GCTCTGAAATTGGCTATACGACGCTCTTCCGATCTTAGCCAATTT
E4	sc_ligation_340	GCTCTGAGAGTCAATATACGACGCTCTTCCGATCTTATTGACTCT
F4	sc_ligation_352	GCTCTGAAATAGACGATACGACGCTCTTCCGATCTTCGTCTATTT
G4	sc_ligation_364	GCTCTGAGAATTAGCATACGACGCTCTTCCGATCTTGCTAATTCT
H4	sc_ligation_376	GCTCTGAACTAGAGAATACGACGCTCTTCCGATCTTTCTCTAGTT
A5	sc_ligation_293	GCTCTGAAGCCGTTCTACGACGCTCTTCCGATCTGAACGGCTT
B5	sc_ligation_305	GCTCTGATATACCGCTACGACGCTCTTCCGATCTGCGGTATAT
C5	sc_ligation_317	GCTCTGACTCCTTACTACGACGCTCTTCCGATCTGTAAGGAGT
D5	sc_ligation_329	GCTCTGATAGTACCTATACGACGCTCTTCCGATCTTAGGTACTAT
E5	sc_ligation_341	GCTCTGAACCTCAATATACGACGCTCTTCCGATCTTATTGAGGTT
F5	sc_ligation_353	GCTCTGACAGAACGATACGACGCTCTTCCGATCTTCGTTCTGT
G5	sc_ligation_365	GCTCTGATTAGTAGCATACGACGCTCTTCCGATCTTGCTACTAAT
H5	sc_ligation_377	GCTCTGAGGTTAAGAATACGACGCTCTTCCGATCTTTCTTAACCT
A6	sc_ligation_294	GCTCTGAGCCTCTTCTACGACGCTCTTCCGATCTGAAGAGGCT
B6	sc_ligation_306	GCTCTGAGCTTCAGCTACGACGCTCTTCCGATCTGCTGAAGCT
C6	sc_ligation_318	GCTCTGACCGTCTACTACGACGCTCTTCCGATCTGTAGACGGT
D6	sc_ligation_330	GCTCTGAAGGTAACTATACGACGCTCTTCCGATCTTAGTTACCTT
E6	sc_ligation_342	GCTCTGATCTCCTGATACGACGCTCTTCCGATCTTCAGGAGAT
F6	sc_ligation_354	GCTCTGAGTAAGTAGATACGACGCTCTTCCGATCTTCTACTTACT
G6	sc_ligation_366	GCTCTGACGGATCCATACGACGCTCTTCCGATCTTGGATCCGT
H6	sc_ligation_378	GCTCTGAAGACTTCAATACGACGCTCTTCCGATCTTTGAAGTCTT
A7	sc_ligation_295	GCTCTGATCCTGGTCTACGACGCTCTTCCGATCTGACCAGGAT
B7	sc_ligation_307	GCTCTGATAGCCAGCTACGACGCTCTTCCGATCTGCTGGCTAT
C7	sc_ligation_319	GCTCTGATGCGATACTACGACGCTCTTCCGATCTGTATCGCAT
D7	sc_ligation_331	GCTCTGAAGCCTTATATACGACGCTCTTCCGATCTTATAAGGCTT
E7	sc_ligation_343	GCTCTGAACTCTATGATACGACGCTCTTCCGATCTTCATAGAGTT
F7	sc_ligation_355	GCTCTGAATTCCTAGATACGACGCTCTTCCGATCTTCTAGGAATT
G7	sc_ligation_367	GCTCTGACTATTACCATACGACGCTCTTCCGATCTTGGTAATAGT
H7	sc_ligation_379	GCTCTGAATCTCTCAATACGACGCTCTTCCGATCTTTGAGAGATT
A8	sc_ligation_296	GCTCTGATGACGGTCTACGACGCTCTTCCGATCTGACCGTCAT
B8	sc_ligation_308	GCTCTGATCAAGTCCTACGACGCTCTTCCGATCTGGACTTGAT
C8	sc_ligation_320	GCTCTGACAGATGACTACGACGCTCTTCCGATCTGTCATCTGT
D8	sc_ligation_332	GCTCTGAACGCATATATACGACGCTCTTCCGATCTTATATGCGTT
E8	sc_ligation_344	GCTCTGAAGCCATGATACGACGCTCTTCCGATCTTCATGGCTT
F8	sc_ligation_356	GCTCTGAAGGTATAGATACGACGCTCTTCCGATCTTCTATACCTT
G8	sc_ligation_368	GCTCTGAGTCTTAACATACGACGCTCTTCCGATCTTGTTAAGACT
H8	sc_ligation_380	GCTCTGATAACTCCAATACGACGCTCTTCCGATCTTTGGAGTTAT
A9	sc_ligation_297	GCTCTGACGAACGTCTACGACGCTCTTCCGATCTGACGTTCGT
B9	sc_ligation_309	GCTCTGATGAGCTCCTACGACGCTCTTCCGATCTGGAGCTCAT
C9	sc_ligation_321	GCTCTGATGCAGGACTACGACGCTCTTCCGATCTGTCCTGCAT
D9	sc_ligation_333	GCTCTGACTCATGATATACGACGCTCTTCCGATCTTATCATGAGT
E9	sc_ligation_345	GCTCTGAGCTTAATGATACGACGCTCTTCCGATCTTCATTAAGCT
F9	sc_ligation_357	GCTCTGAGAGCGAGATACGACGCTCTTCCGATCTTCTCGCTCT
G9	sc_ligation_369	GCTCTGAGCTCATTAATACGACGCTCTTCCGATCTTTAATGAGCT
H9	sc_ligation_381	GCTCTGATATTGCCAATACGACGCTCTTCCGATCTTTGGCAATAT
A10	sc_ligation_298	GCTCTGAGCCAAGTCTACGACGCTCTTCCGATCTGACTTGGCT
B10	sc_ligation_310	GCTCTGAGAACCTCCTACGACGCTCTTCCGATCTGGAGGTTCT
C10	sc_ligation_322	GCTCTGACTTGCAACTACGACGCTCTTCCGATCTGTTGCAAGT
D10	sc_ligation_334	GCTCTGAAGTTCGATATACGACGCTCTTCCGATCTTATCGAACTT
E10	sc_ligation_346	GCTCTGATAACTTGGATACGACGCTCTTCCGATCTTCCAAGTTAT
F10	sc_ligation_358	GCTCTGAACGAATTCATACGACGCTCTTCCGATCTTGAATTCGTT
G10	sc_ligation_370	GCTCTGATGCCTATAATACGACGCTCTTCCGATCTTTATAGGCAT
H10	sc_ligation_382	GCTCTGATGAGCCAATACGACGCTCTTCCGATCTTTGGCTCAT
A11	sc_ligation_299	GCTCTGACTAGTCTCTACGACGCTCTTCCGATCTGAGACTAGT
B11	sc_ligation_311	GCTCTGAGACTTGCCTACGACGCTCTTCCGATCTGGCAAGTCT
C11	sc_ligation_323	GCTCTGACCTTAGTTATACGACGCTCTTCCGATCTTAACTAAGGT
D11	sc_ligation_335	GCTCTGACAAGTCATATACGACGCTCTTCCGATCTTATGACTTGT
E11	sc_ligation_347	GCTCTGAACTATTGGATACGACGCTCTTCCGATCTTCCAATAGTT
F11	sc_ligation_359	GCTCTGACCTCGTCATACGACGCTCTTCCGATCTTGACGAGGT
G11	sc_ligation_371	GCTCTGATCAGTTGAATACGACGCTCTTCCGATCTTTCAACTGAT
H11	sc_ligation_383	GCTCTGACTTAACCAATACGACGCTCTTCCGATCTTTGGTTAAGT
A12	sc_ligation_300	GCTCTGAGGTCGATCTACGACGCTCTTCCGATCTGATCGACCT
B12	sc_ligation_312	GCTCTGAAGTAAGCCTACGACGCTCTTCCGATCTGGCTTACTT
C12	sc_ligation_324	GCTCTGACTACCGTATACGACGCTCTTCCGATCTTACGGTAGT
D12	sc_ligation_336	GCTCTGAGTTCTCATATACGACGCTCTTCCGATCTTATGAGAACT
E12	sc_ligation_348	GCTCTGAAGAATAGGATACGACGCTCTTCCGATCTTCCTATTCTT
F12	sc_ligation_360	GCTCTGATGATTCTCATACGACGCTCTTCCGATCTTGAGAATCAT
G12	sc_ligation_372	GCTCTGAGTAATGGAATACGACGCTCTTCCGATCTTTCCATTACT
H12	sc_ligation_384	GCTCTGACTAAGCAAATACGACGCTCTTCCGATCTTTTGCTTAGT

## Sheet: PCR_P7_plate1
Well Position
A1	index_10nt_1478	CAAGCAGAAGACGGCATACGAGATccgaatccgaGTCTCGTGGGCTCGG
B1	index_10nt_1446	CAAGCAGAAGACGGCATACGAGATataagccggaGTCTCGTGGGCTCGG
C1	index_10nt_1472	CAAGCAGAAGACGGCATACGAGATccggcggcgaGTCTCGTGGGCTCGG
D1	index_10nt_1825	CAAGCAGAAGACGGCATACGAGATggcttgccaaGTCTCGTGGGCTCGG
E1	index_10nt_461	CAAGCAGAAGACGGCATACGAGATccgctagctgGTCTCGTGGGCTCGG
F1	index_10nt_1170	CAAGCAGAAGACGGCATACGAGATcttatcctacGTCTCGTGGGCTCGG
G1	index_10nt_56	CAAGCAGAAGACGGCATACGAGATtgagctacttGTCTCGTGGGCTCGG
H1	index_10nt_1292	CAAGCAGAAGACGGCATACGAGATtcaggacttaGTCTCGTGGGCTCGG
A2	index_10nt_965	CAAGCAGAAGACGGCATACGAGATccgcagccgcGTCTCGTGGGCTCGG
B2	index_10nt_105	CAAGCAGAAGACGGCATACGAGATtgcgcctggtGTCTCGTGGGCTCGG
C2	index_10nt_539	CAAGCAGAAGACGGCATACGAGATaatcatacggGTCTCGTGGGCTCGG
D2	index_10nt_1800	CAAGCAGAAGACGGCATACGAGATcgccaatcaaGTCTCGTGGGCTCGG
E2	index_10nt_687	CAAGCAGAAGACGGCATACGAGATcaaggcttagGTCTCGTGGGCTCGG
F2	index_10nt_669	CAAGCAGAAGACGGCATACGAGATgcgctcgacgGTCTCGTGGGCTCGG
G2	index_10nt_1409	CAAGCAGAAGACGGCATACGAGATtccagcaataGTCTCGTGGGCTCGG
H2	index_10nt_298	CAAGCAGAAGACGGCATACGAGATcatgagaactGTCTCGTGGGCTCGG
A3	index_10nt_218	CAAGCAGAAGACGGCATACGAGATaacgtaatctGTCTCGTGGGCTCGG
B3	index_10nt_206	CAAGCAGAAGACGGCATACGAGATattctcctctGTCTCGTGGGCTCGG
C3	index_10nt_14	CAAGCAGAAGACGGCATACGAGATtctgcgcgttGTCTCGTGGGCTCGG
D3	index_10nt_917	CAAGCAGAAGACGGCATACGAGATgctcatatgcGTCTCGTGGGCTCGG
E3	index_10nt_676	CAAGCAGAAGACGGCATACGAGATagcggtaacgGTCTCGTGGGCTCGG
F3	index_10nt_164	CAAGCAGAAGACGGCATACGAGATaatgaatagtGTCTCGTGGGCTCGG
G3	index_10nt_504	CAAGCAGAAGACGGCATACGAGATccgtatctggGTCTCGTGGGCTCGG
H3	index_10nt_449	CAAGCAGAAGACGGCATACGAGATccttagtctgGTCTCGTGGGCTCGG
A4	index_10nt_684	CAAGCAGAAGACGGCATACGAGATacctagttagGTCTCGTGGGCTCGG
B4	index_10nt_1161	CAAGCAGAAGACGGCATACGAGATataggagtacGTCTCGTGGGCTCGG
C4	index_10nt_724	CAAGCAGAAGACGGCATACGAGATctacgacgagGTCTCGTGGGCTCGG
D4	index_10nt_789	CAAGCAGAAGACGGCATACGAGATagtcgagttcGTCTCGTGGGCTCGG
E4	index_10nt_828	CAAGCAGAAGACGGCATACGAGATtggtccagtcGTCTCGTGGGCTCGG
F4	index_10nt_1816	CAAGCAGAAGACGGCATACGAGATatctaagcaaGTCTCGTGGGCTCGG
G4	index_10nt_9	CAAGCAGAAGACGGCATACGAGATcgaattcgttGTCTCGTGGGCTCGG
H4	index_10nt_1499	CAAGCAGAAGACGGCATACGAGATcagcgatagaGTCTCGTGGGCTCGG
A5	index_10nt_475	CAAGCAGAAGACGGCATACGAGATggtcgctatgGTCTCGTGGGCTCGG
B5	index_10nt_975	CAAGCAGAAGACGGCATACGAGATatccgttagcGTCTCGTGGGCTCGG
C5	index_10nt_690	CAAGCAGAAGACGGCATACGAGATtcgcaattagGTCTCGTGGGCTCGG
D5	index_10nt_699	CAAGCAGAAGACGGCATACGAGATggctggctagGTCTCGTGGGCTCGG
E5	index_10nt_906	CAAGCAGAAGACGGCATACGAGATacggtcttgcGTCTCGTGGGCTCGG
F5	index_10nt_584	CAAGCAGAAGACGGCATACGAGATgctccattcgGTCTCGTGGGCTCGG
G5	index_10nt_628	CAAGCAGAAGACGGCATACGAGATacgataagcgGTCTCGTGGGCTCGG
H5	index_10nt_960	CAAGCAGAAGACGGCATACGAGATaccatagcgcGTCTCGTGGGCTCGG
A6	index_10nt_527	CAAGCAGAAGACGGCATACGAGATctcttagcggGTCTCGTGGGCTCGG
B6	index_10nt_299	CAAGCAGAAGACGGCATACGAGATtgattcaactGTCTCGTGGGCTCGG
C6	index_10nt_620	CAAGCAGAAGACGGCATACGAGATtatggccgcgGTCTCGTGGGCTCGG
D6	index_10nt_1601	CAAGCAGAAGACGGCATACGAGATagaggtcgcaGTCTCGTGGGCTCGG
E6	index_10nt_1416	CAAGCAGAAGACGGCATACGAGATaggagattgaGTCTCGTGGGCTCGG
F6	index_10nt_702	CAAGCAGAAGACGGCATACGAGATggctatatagGTCTCGTGGGCTCGG
G6	index_10nt_55	CAAGCAGAAGACGGCATACGAGATtcgcgtacttGTCTCGTGGGCTCGG
H6	index_10nt_493	CAAGCAGAAGACGGCATACGAGATaataataatgGTCTCGTGGGCTCGG
A7	index_10nt_383	CAAGCAGAAGACGGCATACGAGATttcgttccatGTCTCGTGGGCTCGG
B7	index_10nt_1577	CAAGCAGAAGACGGCATACGAGATtacctaatcaGTCTCGTGGGCTCGG
C7	index_10nt_75	CAAGCAGAAGACGGCATACGAGATaagtaatattGTCTCGTGGGCTCGG
D7	index_10nt_412	CAAGCAGAAGACGGCATACGAGATagctaagaatGTCTCGTGGGCTCGG
E7	index_10nt_313	CAAGCAGAAGACGGCATACGAGATgtcgaggtatGTCTCGTGGGCTCGG
F7	index_10nt_696	CAAGCAGAAGACGGCATACGAGATttattagtagGTCTCGTGGGCTCGG
G7	index_10nt_883	CAAGCAGAAGACGGCATACGAGATtgcgaagatcGTCTCGTGGGCTCGG
H7	index_10nt_228	CAAGCAGAAGACGGCATACGAGATaactacggctGTCTCGTGGGCTCGG
A8	index_10nt_974	CAAGCAGAAGACGGCATACGAGATaacggaacgcGTCTCGTGGGCTCGG
B8	index_10nt_1483	CAAGCAGAAGACGGCATACGAGATgatgctacgaGTCTCGTGGGCTCGG
C8	index_10nt_420	CAAGCAGAAGACGGCATACGAGATatctgccaatGTCTCGTGGGCTCGG
D8	index_10nt_1792	CAAGCAGAAGACGGCATACGAGATatcgtatcaaGTCTCGTGGGCTCGG
E8	index_10nt_1334	CAAGCAGAAGACGGCATACGAGATaacgcctctaGTCTCGTGGGCTCGG
F8	index_10nt_1675	CAAGCAGAAGACGGCATACGAGATacggcaaccaGTCTCGTGGGCTCGG
G8	index_10nt_1521	CAAGCAGAAGACGGCATACGAGATcaggctaagaGTCTCGTGGGCTCGG
H8	index_10nt_1569	CAAGCAGAAGACGGCATACGAGATcgcaatatcaGTCTCGTGGGCTCGG
A9	index_10nt_1135	CAAGCAGAAGACGGCATACGAGATttcgataaccGTCTCGTGGGCTCGG
B9	index_10nt_1528	CAAGCAGAAGACGGCATACGAGATaacctcaagaGTCTCGTGGGCTCGG
C9	index_10nt_388	CAAGCAGAAGACGGCATACGAGATcaggcgccatGTCTCGTGGGCTCGG
D9	index_10nt_1369	CAAGCAGAAGACGGCATACGAGATaactattataGTCTCGTGGGCTCGG
E9	index_10nt_1352	CAAGCAGAAGACGGCATACGAGATaagttacctaGTCTCGTGGGCTCGG
F9	index_10nt_1453	CAAGCAGAAGACGGCATACGAGATcggcagaggaGTCTCGTGGGCTCGG
G9	index_10nt_1728	CAAGCAGAAGACGGCATACGAGATgcctcaataaGTCTCGTGGGCTCGG
H9	index_10nt_144	CAAGCAGAAGACGGCATACGAGATttaacgccgtGTCTCGTGGGCTCGG
A10	index_10nt_919	CAAGCAGAAGACGGCATACGAGATcatacgatgcGTCTCGTGGGCTCGG
B10	index_10nt_270	CAAGCAGAAGACGGCATACGAGATaagctgacctGTCTCGTGGGCTCGG
C10	index_10nt_304	CAAGCAGAAGACGGCATACGAGATgagtccttatGTCTCGTGGGCTCGG
D10	index_10nt_1805	CAAGCAGAAGACGGCATACGAGATcctacggcaaGTCTCGTGGGCTCGG
E10	index_10nt_1751	CAAGCAGAAGACGGCATACGAGATaatattcgaaGTCTCGTGGGCTCGG
F10	index_10nt_901	CAAGCAGAAGACGGCATACGAGATttcaagaatcGTCTCGTGGGCTCGG
G10	index_10nt_1807	CAAGCAGAAGACGGCATACGAGATatgctcgcaaGTCTCGTGGGCTCGG
H10	index_10nt_1099	CAAGCAGAAGACGGCATACGAGATggagtaagccGTCTCGTGGGCTCGG
A11	index_10nt_67	CAAGCAGAAGACGGCATACGAGATttatcgtattGTCTCGTGGGCTCGG
B11	index_10nt_1398	CAAGCAGAAGACGGCATACGAGATaagtctaataGTCTCGTGGGCTCGG
C11	index_10nt_1355	CAAGCAGAAGACGGCATACGAGATcggcttactaGTCTCGTGGGCTCGG
D11	index_10nt_197	CAAGCAGAAGACGGCATACGAGATgatatggtctGTCTCGTGGGCTCGG
E11	index_10nt_1632	CAAGCAGAAGACGGCATACGAGATtagtcgtccaGTCTCGTGGGCTCGG
F11	index_10nt_1166	CAAGCAGAAGACGGCATACGAGATtagctgctacGTCTCGTGGGCTCGG
G11	index_10nt_1005	CAAGCAGAAGACGGCATACGAGATctcttcaagcGTCTCGTGGGCTCGG
H11	index_10nt_959	CAAGCAGAAGACGGCATACGAGATatgaacgcgcGTCTCGTGGGCTCGG
A12	index_10nt_1746	CAAGCAGAAGACGGCATACGAGATgtcgacggaaGTCTCGTGGGCTCGG
B12	index_10nt_709	CAAGCAGAAGACGGCATACGAGATactaattgagGTCTCGTGGGCTCGG
C12	index_10nt_401	CAAGCAGAAGACGGCATACGAGATcttgcataatGTCTCGTGGGCTCGG
D12	index_10nt_1831	CAAGCAGAAGACGGCATACGAGATtccttaccaaGTCTCGTGGGCTCGG
E12	index_10nt_1172	CAAGCAGAAGACGGCATACGAGATtgcagcctacGTCTCGTGGGCTCGG
F12	index_10nt_555	CAAGCAGAAGACGGCATACGAGATggagctgaggGTCTCGTGGGCTCGG
G12	index_10nt_287	CAAGCAGAAGACGGCATACGAGATgcagcggactGTCTCGTGGGCTCGG
H12	index_10nt_844	CAAGCAGAAGACGGCATACGAGATcatcgcgctcGTCTCGTGGGCTCGG

## Sheet: PCR_P7_plate2
Well Position
A1	index_10nt_1208	CAAGCAGAAGACGGCATACGAGATggttggcgacGTCTCGTGGGCTCGG
B1	index_10nt_12	CAAGCAGAAGACGGCATACGAGATgtagatcgttGTCTCGTGGGCTCGG
C1	index_10nt_4	CAAGCAGAAGACGGCATACGAGATgaggtcggttGTCTCGTGGGCTCGG
D1	index_10nt_254	CAAGCAGAAGACGGCATACGAGATacgcgctcctGTCTCGTGGGCTCGG
E1	index_10nt_314	CAAGCAGAAGACGGCATACGAGATagcgtcgtatGTCTCGTGGGCTCGG
F1	index_10nt_607	CAAGCAGAAGACGGCATACGAGATgaccaatgcgGTCTCGTGGGCTCGG
G1	index_10nt_241	CAAGCAGAAGACGGCATACGAGATaggtagagctGTCTCGTGGGCTCGG
H1	index_10nt_87	CAAGCAGAAGACGGCATACGAGATttgcagcattGTCTCGTGGGCTCGG
A2	index_10nt_956	CAAGCAGAAGACGGCATACGAGATgtagatgcgcGTCTCGTGGGCTCGG
B2	index_10nt_941	CAAGCAGAAGACGGCATACGAGATtcggtaaggcGTCTCGTGGGCTCGG
C2	index_10nt_290	CAAGCAGAAGACGGCATACGAGATacgatagactGTCTCGTGGGCTCGG
D2	index_10nt_903	CAAGCAGAAGACGGCATACGAGATgcggccaatcGTCTCGTGGGCTCGG
E2	index_10nt_598	CAAGCAGAAGACGGCATACGAGATacgcgtatcgGTCTCGTGGGCTCGG
F2	index_10nt_1791	CAAGCAGAAGACGGCATACGAGATcatgactcaaGTCTCGTGGGCTCGG
G2	index_10nt_1828	CAAGCAGAAGACGGCATACGAGATactccgccaaGTCTCGTGGGCTCGG
H2	index_10nt_494	CAAGCAGAAGACGGCATACGAGATacgttgaatgGTCTCGTGGGCTCGG
A3	index_10nt_1469	CAAGCAGAAGACGGCATACGAGATaggactgcgaGTCTCGTGGGCTCGG
B3	index_10nt_1088	CAAGCAGAAGACGGCATACGAGATactcgacgccGTCTCGTGGGCTCGG
C3	index_10nt_1720	CAAGCAGAAGACGGCATACGAGATcctatcataaGTCTCGTGGGCTCGG
D3	index_10nt_1544	CAAGCAGAAGACGGCATACGAGATaatccggtcaGTCTCGTGGGCTCGG
E3	index_10nt_1670	CAAGCAGAAGACGGCATACGAGATctattaaccaGTCTCGTGGGCTCGG
F3	index_10nt_138	CAAGCAGAAGACGGCATACGAGATgatccagcgtGTCTCGTGGGCTCGG
G3	index_10nt_1336	CAAGCAGAAGACGGCATACGAGATtgagactctaGTCTCGTGGGCTCGG
H3	index_10nt_1462	CAAGCAGAAGACGGCATACGAGATgcggagtcgaGTCTCGTGGGCTCGG
A4	index_10nt_64	CAAGCAGAAGACGGCATACGAGATgaggcttattGTCTCGTGGGCTCGG
B4	index_10nt_377	CAAGCAGAAGACGGCATACGAGATcgccaggcatGTCTCGTGGGCTCGG
C4	index_10nt_25	CAAGCAGAAGACGGCATACGAGATaataccagttGTCTCGTGGGCTCGG
D4	index_10nt_438	CAAGCAGAAGACGGCATACGAGATgcggttattgGTCTCGTGGGCTCGG
E4	index_10nt_1658	CAAGCAGAAGACGGCATACGAGATcatccagccaGTCTCGTGGGCTCGG
F4	index_10nt_1289	CAAGCAGAAGACGGCATACGAGATggctgccttaGTCTCGTGGGCTCGG
G4	index_10nt_726	CAAGCAGAAGACGGCATACGAGATttctatagagGTCTCGTGGGCTCGG
H4	index_10nt_774	CAAGCAGAAGACGGCATACGAGATtctagtcaagGTCTCGTGGGCTCGG
A5	index_10nt_1406	CAAGCAGAAGACGGCATACGAGATacggagaataGTCTCGTGGGCTCGG
B5	index_10nt_1682	CAAGCAGAAGACGGCATACGAGATattaacttaaGTCTCGTGGGCTCGG
C5	index_10nt_1500	CAAGCAGAAGACGGCATACGAGATcgtattgagaGTCTCGTGGGCTCGG
D5	index_10nt_1815	CAAGCAGAAGACGGCATACGAGATtagccagcaaGTCTCGTGGGCTCGG
E5	index_10nt_127	CAAGCAGAAGACGGCATACGAGATtcggcgtcgtGTCTCGTGGGCTCGG
F5	index_10nt_1378	CAAGCAGAAGACGGCATACGAGATgcctgatataGTCTCGTGGGCTCGG
G5	index_10nt_381	CAAGCAGAAGACGGCATACGAGATgcctcagcatGTCTCGTGGGCTCGG
H5	index_10nt_782	CAAGCAGAAGACGGCATACGAGATatctaggttcGTCTCGTGGGCTCGG
A6	index_10nt_423	CAAGCAGAAGACGGCATACGAGATgacgaggttgGTCTCGTGGGCTCGG
B6	index_10nt_1	CAAGCAGAAGACGGCATACGAGATctggttggttGTCTCGTGGGCTCGG
C6	index_10nt_123	CAAGCAGAAGACGGCATACGAGATccgcgcaggtGTCTCGTGGGCTCGG
D6	index_10nt_509	CAAGCAGAAGACGGCATACGAGATactctactggGTCTCGTGGGCTCGG
E6	index_10nt_1617	CAAGCAGAAGACGGCATACGAGATcctgagagcaGTCTCGTGGGCTCGG
F6	index_10nt_1709	CAAGCAGAAGACGGCATACGAGATaccagtataaGTCTCGTGGGCTCGG
G6	index_10nt_814	CAAGCAGAAGACGGCATACGAGATtccgccggtcGTCTCGTGGGCTCGG
H6	index_10nt_59	CAAGCAGAAGACGGCATACGAGATtgcctaacttGTCTCGTGGGCTCGG
A7	index_10nt_1501	CAAGCAGAAGACGGCATACGAGATttctctgagaGTCTCGTGGGCTCGG
B7	index_10nt_1795	CAAGCAGAAGACGGCATACGAGATcctgcatcaaGTCTCGTGGGCTCGG
C7	index_10nt_558	CAAGCAGAAGACGGCATACGAGATtctgacgaggGTCTCGTGGGCTCGG
D7	index_10nt_1745	CAAGCAGAAGACGGCATACGAGATgattccggaaGTCTCGTGGGCTCGG
E7	index_10nt_678	CAAGCAGAAGACGGCATACGAGATtggcataacgGTCTCGTGGGCTCGG
F7	index_10nt_1049	CAAGCAGAAGACGGCATACGAGATtctctcatccGTCTCGTGGGCTCGG
G7	index_10nt_258	CAAGCAGAAGACGGCATACGAGATttcgctgcctGTCTCGTGGGCTCGG
H7	index_10nt_871	CAAGCAGAAGACGGCATACGAGATggattctatcGTCTCGTGGGCTCGG
A8	index_10nt_1092	CAAGCAGAAGACGGCATACGAGATtagaatagccGTCTCGTGGGCTCGG
B8	index_10nt_1579	CAAGCAGAAGACGGCATACGAGATgctcgaatcaGTCTCGTGGGCTCGG
C8	index_10nt_360	CAAGCAGAAGACGGCATACGAGATggctcgagatGTCTCGTGGGCTCGG
D8	index_10nt_142	CAAGCAGAAGACGGCATACGAGATtcctctccgtGTCTCGTGGGCTCGG
E8	index_10nt_785	CAAGCAGAAGACGGCATACGAGATataaccgttcGTCTCGTGGGCTCGG
F8	index_10nt_510	CAAGCAGAAGACGGCATACGAGATaggtctatggGTCTCGTGGGCTCGG
G8	index_10nt_1139	CAAGCAGAAGACGGCATACGAGATagcaagaaccGTCTCGTGGGCTCGG
H8	index_10nt_1737	CAAGCAGAAGACGGCATACGAGATttgatatgaaGTCTCGTGGGCTCGG
A9	index_10nt_185	CAAGCAGAAGACGGCATACGAGATtggcagaagtGTCTCGTGGGCTCGG
B9	index_10nt_1491	CAAGCAGAAGACGGCATACGAGATcttcattagaGTCTCGTGGGCTCGG
C9	index_10nt_867	CAAGCAGAAGACGGCATACGAGATaatcgaactcGTCTCGTGGGCTCGG
D9	index_10nt_1609	CAAGCAGAAGACGGCATACGAGATggacgacgcaGTCTCGTGGGCTCGG
E9	index_10nt_1736	CAAGCAGAAGACGGCATACGAGATcgtctatgaaGTCTCGTGGGCTCGG
F9	index_10nt_253	CAAGCAGAAGACGGCATACGAGATcgaatctcctGTCTCGTGGGCTCGG
G9	index_10nt_1461	CAAGCAGAAGACGGCATACGAGATggctattcgaGTCTCGTGGGCTCGG
H9	index_10nt_1303	CAAGCAGAAGACGGCATACGAGATtctatcggtaGTCTCGTGGGCTCGG
A10	index_10nt_487	CAAGCAGAAGACGGCATACGAGATcgaaggcatgGTCTCGTGGGCTCGG
B10	index_10nt_1509	CAAGCAGAAGACGGCATACGAGATaattgagagaGTCTCGTGGGCTCGG
C10	index_10nt_340	CAAGCAGAAGACGGCATACGAGATgtagttggatGTCTCGTGGGCTCGG
D10	index_10nt_114	CAAGCAGAAGACGGCATACGAGATcctaagcggtGTCTCGTGGGCTCGG
E10	index_10nt_170	CAAGCAGAAGACGGCATACGAGATcgtaaggagtGTCTCGTGGGCTCGG
F10	index_10nt_1348	CAAGCAGAAGACGGCATACGAGATaagcatcctaGTCTCGTGGGCTCGG
G10	index_10nt_1222	CAAGCAGAAGACGGCATACGAGATctgaagagacGTCTCGTGGGCTCGG
H10	index_10nt_1435	CAAGCAGAAGACGGCATACGAGATggcttctggaGTCTCGTGGGCTCGG
A11	index_10nt_961	CAAGCAGAAGACGGCATACGAGATagcgatccgcGTCTCGTGGGCTCGG
B11	index_10nt_202	CAAGCAGAAGACGGCATACGAGATacgcttctctGTCTCGTGGGCTCGG
C11	index_10nt_893	CAAGCAGAAGACGGCATACGAGATatatgccatcGTCTCGTGGGCTCGG
D11	index_10nt_1279	CAAGCAGAAGACGGCATACGAGATaagtacgttaGTCTCGTGGGCTCGG
E11	index_10nt_717	CAAGCAGAAGACGGCATACGAGATgaatgaggagGTCTCGTGGGCTCGG
F11	index_10nt_1687	CAAGCAGAAGACGGCATACGAGATaggccggtaaGTCTCGTGGGCTCGG
G11	index_10nt_300	CAAGCAGAAGACGGCATACGAGATgccatcaactGTCTCGTGGGCTCGG
H11	index_10nt_356	CAAGCAGAAGACGGCATACGAGATactggtagatGTCTCGTGGGCTCGG
A12	index_10nt_831	CAAGCAGAAGACGGCATACGAGATatgagttctcGTCTCGTGGGCTCGG
B12	index_10nt_1122	CAAGCAGAAGACGGCATACGAGATccatcggaccGTCTCGTGGGCTCGG
C12	index_10nt_1114	CAAGCAGAAGACGGCATACGAGATggcatctaccGTCTCGTGGGCTCGG
D12	index_10nt_1357	CAAGCAGAAGACGGCATACGAGATttctctactaGTCTCGTGGGCTCGG
E12	index_10nt_32	CAAGCAGAAGACGGCATACGAGATccaggctcttGTCTCGTGGGCTCGG
F12	index_10nt_565	CAAGCAGAAGACGGCATACGAGATatccatcaggGTCTCGTGGGCTCGG
G12	index_10nt_1812	CAAGCAGAAGACGGCATACGAGATctcggagcaaGTCTCGTGGGCTCGG
H12	index_10nt_1192	CAAGCAGAAGACGGCATACGAGATggcggttgacGTCTCGTGGGCTCGG

[truncated: 4 more sheets: PCR_P7_plate3, PCR_P7_plate4, PCR_P5, Tn5_oligos]
